# Supplementary material for: A convenient catalytic method for preparation of new tetrahydropyrido[2,3-d]pyrimidines via a cooperative vinylogous anomeric based oxidation
Source: Royal Society of Chemistry journal article supplement (doi:10.1039/d2ra05655k), 2022-01-01
Supplement: d2ra05655k1.pdf [file d2ra05655k1.pdf]

**A convenient catalytic method for preparation of new tetrahydropyrido[2,3-*d*]pyrimidines via a cooperative vinylogous anomeric based oxidation**

Hassan Sephrmansourie,<sup>a</sup> Sima Kalhor,<sup>a</sup> Mahmoud Zarei,<sup>\*b</sup> Mohammad Ali Zolfigol\*<sup>a</sup> and  
Mojtaba Hosseinfard<sup>c</sup>

---

<sup>a</sup> Department of Organic Chemistry, Faculty of Chemistry, Bu-Ali Sina University, Hamedan 6517838683, Tel: +988138282807, Fax: +988138380709 Iran. *E-Mail:* *mahmoud8103@yahoo.com or zolfi@basu.ac.ir & mzolfigol@yahoo.com.*

<sup>b</sup> Department of Chemistry, Faculty of Science, University of Qom, Qom, 37185-359, Iran. *E-Mail:* *mahmoud8103@yahoo.com (M. Zarei).*

<sup>c</sup> Department of Energy, Materials and Energy Research Center, P.O. Box 31787-316, Karaj, Iran *E-mail:* *m.hosseini@merc.ac.ir.*

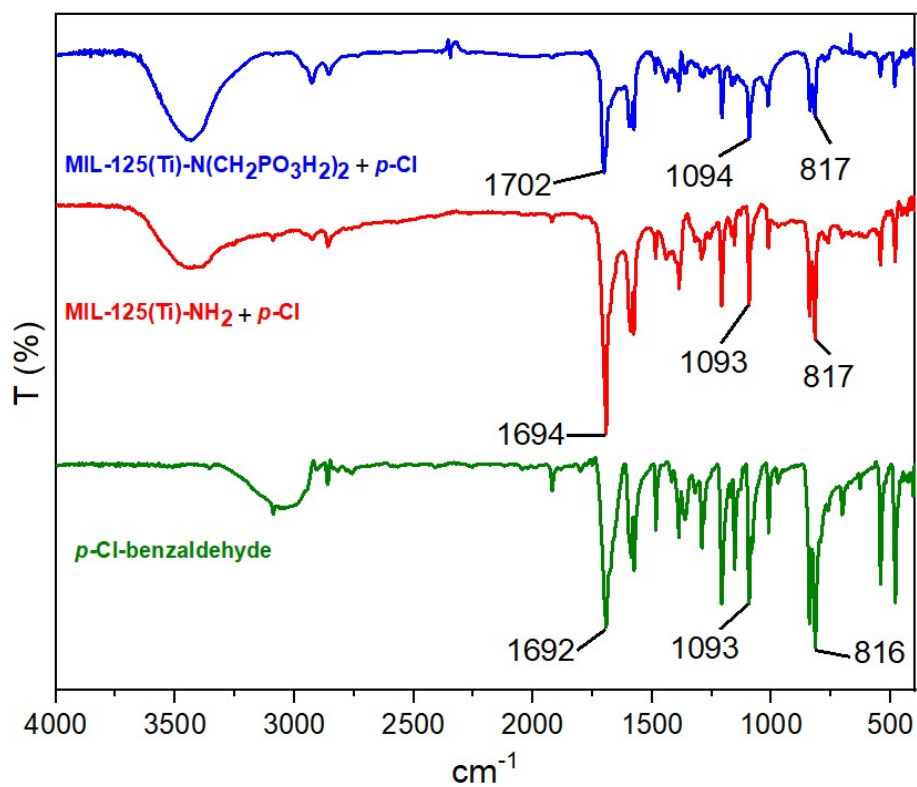

**Figure S1:** FT-IR spectra of *p*-Cl-benzaldehyde in percent of MIL-125(Ti)-NH<sub>2</sub> and MIL-125(Ti)-N(CH<sub>2</sub>PO<sub>3</sub>H<sub>2</sub>)<sub>2</sub>.

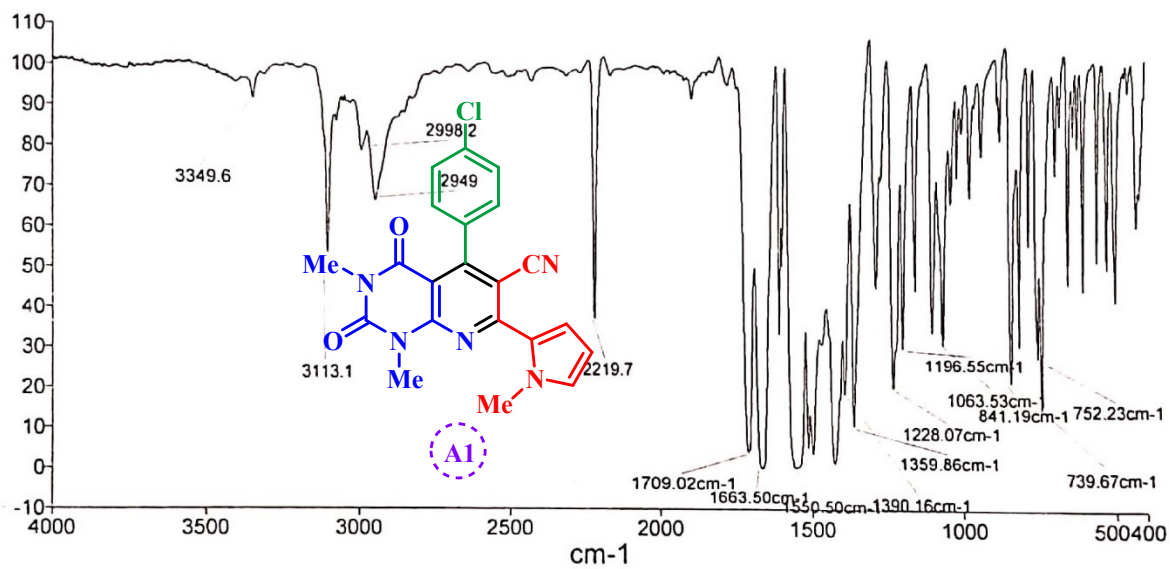

*FT-IR spectrum of 5-(4-chlorophenyl)-1,3-dimethyl-7-(1-methyl-1H-pyrrol-2-yl)-2,4-dioxo-1,2,3,4 tetrahydropyrido[2,3-d]pyrimidine-6-carbonitrile (A1).*

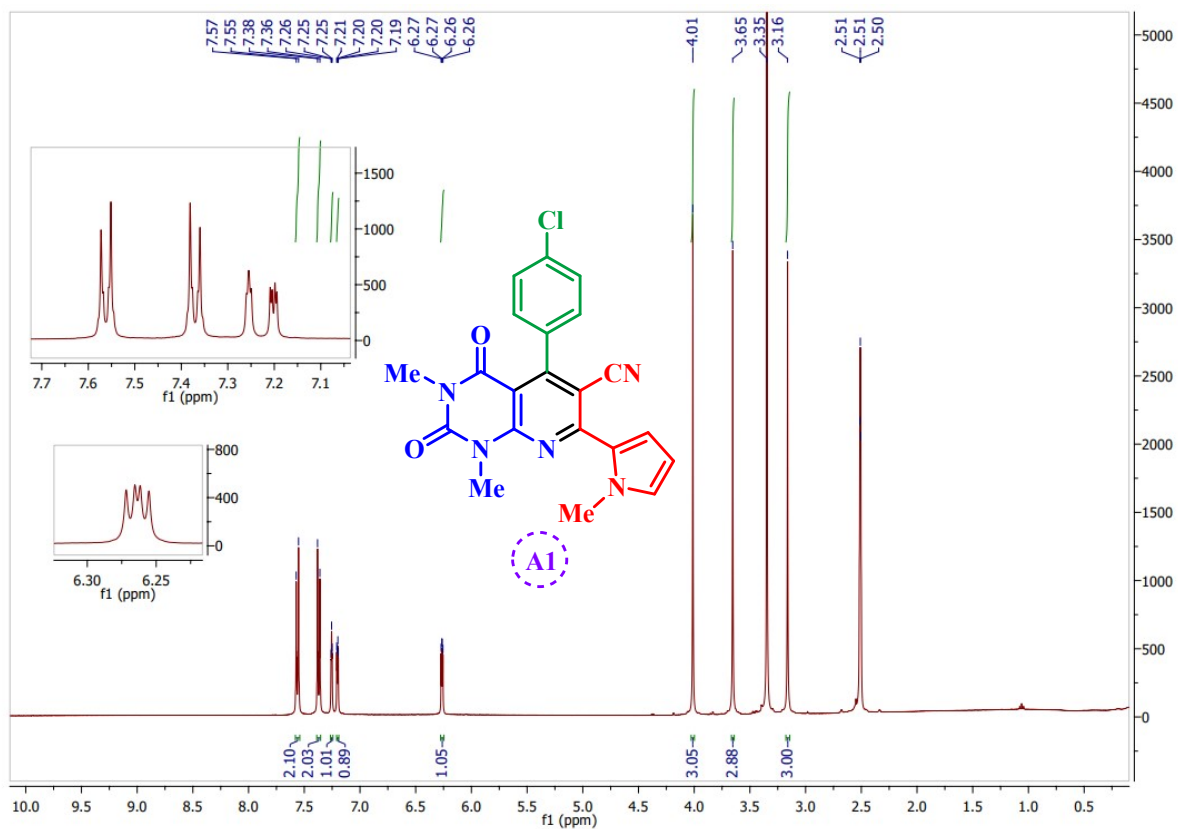

$^1\text{H-NMR}$  spectrum of 5-(4-chlorophenyl)-1,3-dimethyl-7-(1-methyl-1H-pyrrol-2-yl)-2,4-dioxo-1,2,3,4-tetrahydropyrido[2,3-d]pyrimidine-6-carbonitrile (**A1**).

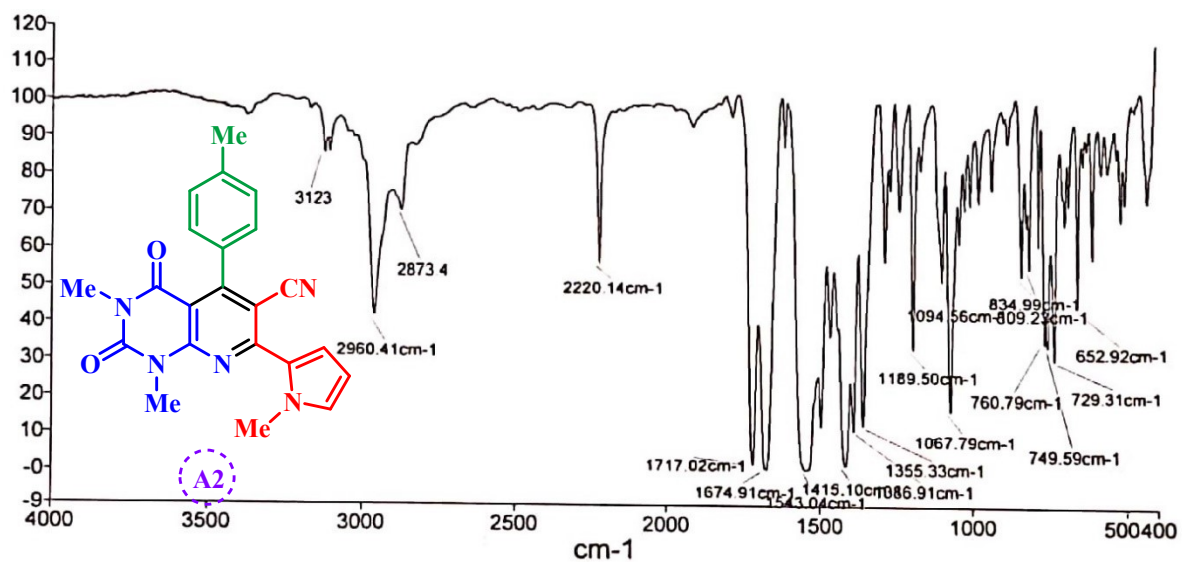

*FT-IR spectrum of 1,3-dimethyl-7-(1-methyl-1H-pyrrol-2-yl)-2,4-dioxo-5-(p-tolyl)-1,2,3,4-tetrahydropyrido[2,3-d]pyrimidine-6-carbonitrile (A2).*

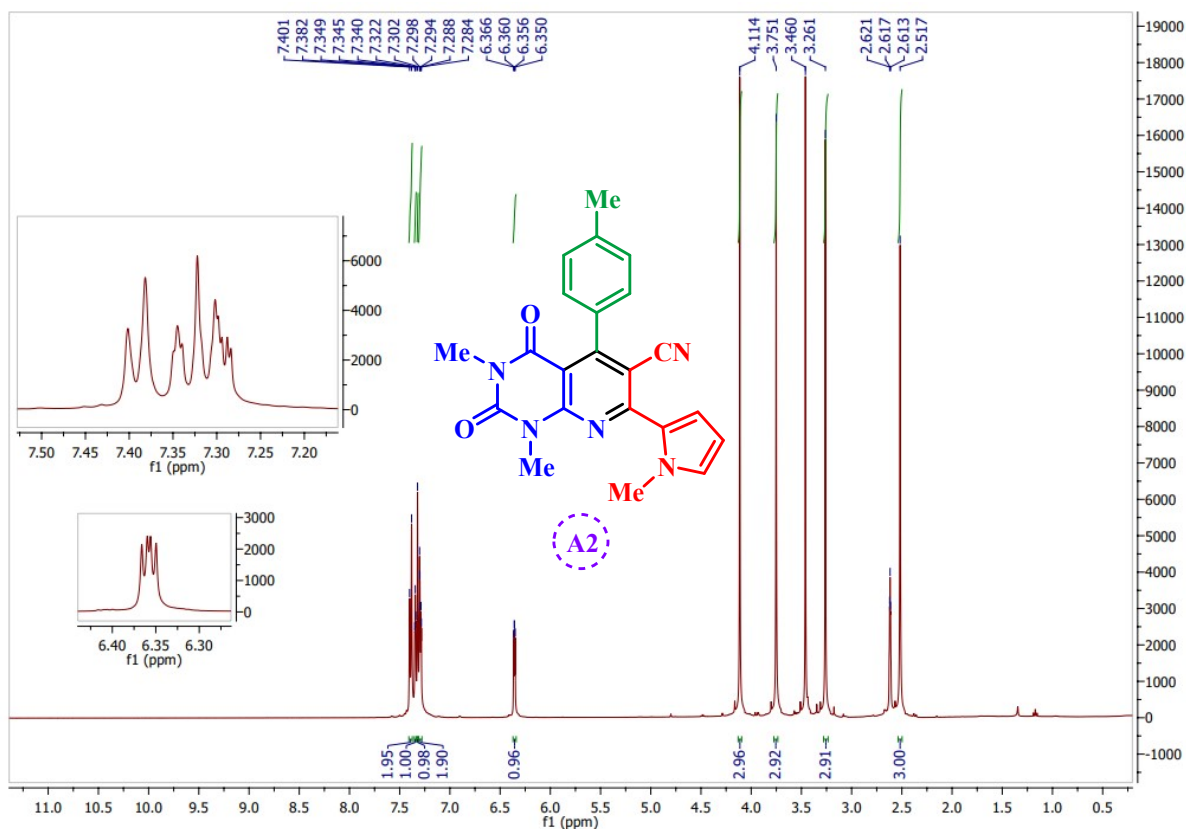

<sup>1</sup>H-NMR spectrum of *1,3-dimethyl-7-(1-methyl-1H-pyrrol-2-yl)-2,4-dioxo-5-(p-tolyl)-1,2,3,4-tetrahydropyrido[2,3-d]pyrimidine-6-carbonitrile (A2)*.

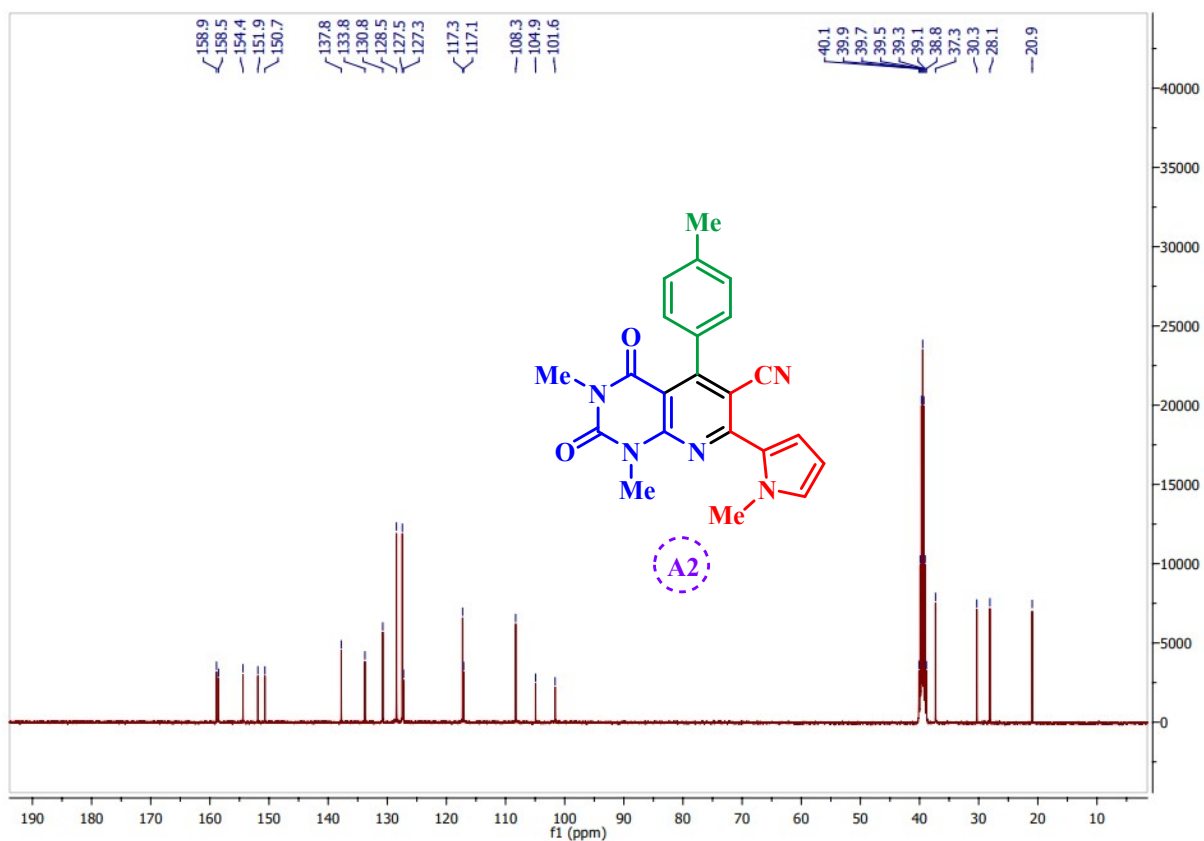

$^{13}\text{C}$ -NMR spectrum of 1,3-dimethyl-7-(1-methyl-1H-pyrrol-2-yl)-2,4-dioxo-5-(p-tolyl)-1,2,3,4-tetrahydropyrido[2,3-d]pyrimidine-6-carbonitrile (A2).

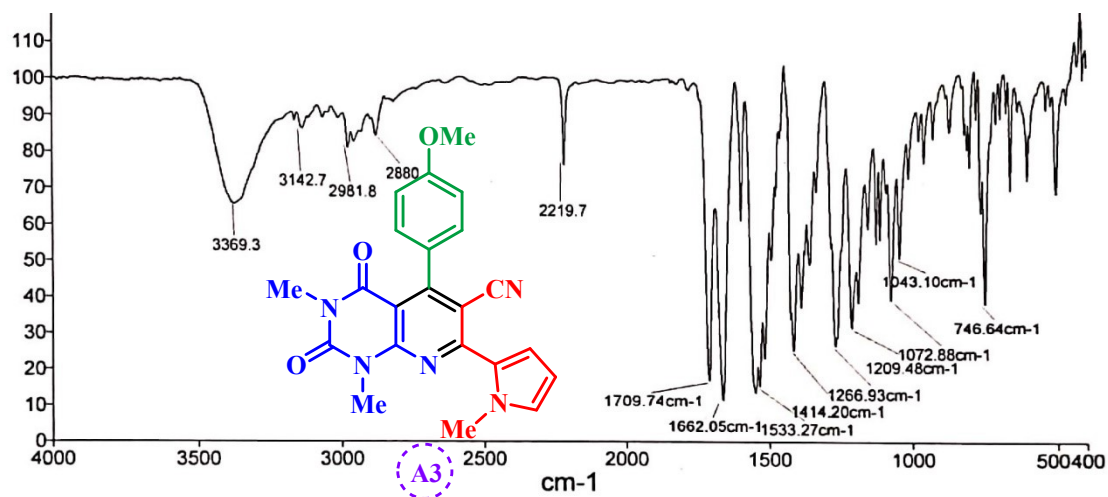

FT-IR spectrum of 5-(4-methoxyphenyl)-1,3-dimethyl-7-(1-methyl-1H-pyrrol-2-yl)-2,4-dioxo-1,2,3,4-tetrahydropyrido[2,3-d]pyrimidine-6-carbonitrile (A3).



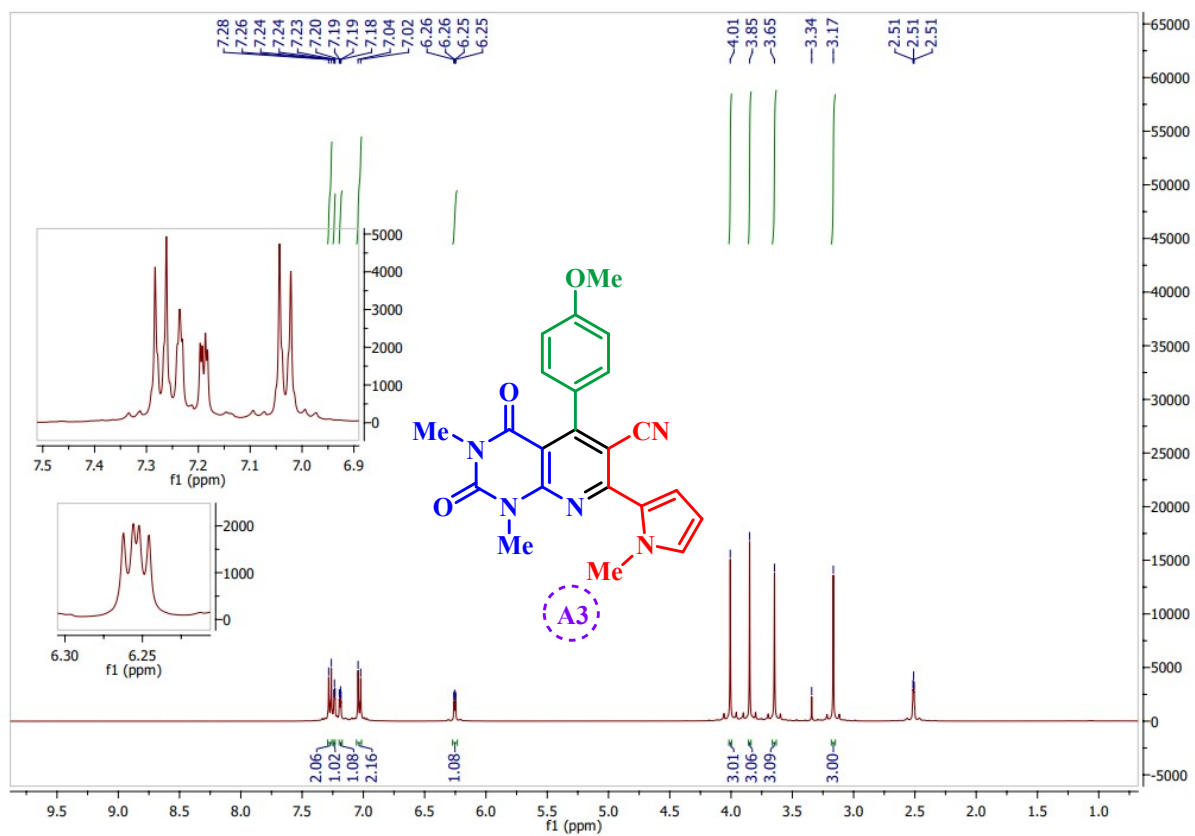

<sup>1</sup>H-NMR spectrum of 5-(4-methoxyphenyl)-1,3-dimethyl-7-(1-methyl-1H-pyrrol-2-yl)-2,4-dioxo-1,2,3,4-tetrahydropyrido[2,3-d]pyrimidine-6-carbonitrile (A3).

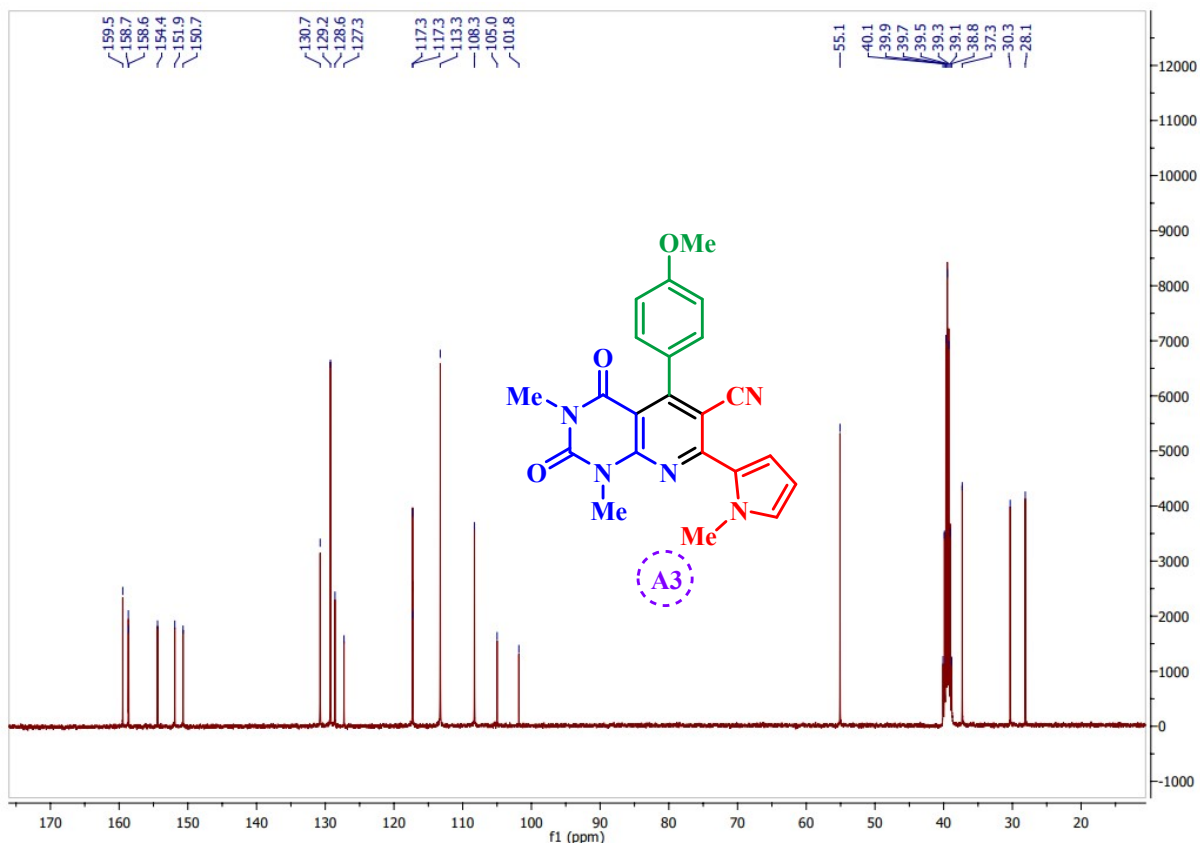

$^{13}\text{C}$ -NMR spectrum of 5-(4-methoxyphenyl)-1,3-dimethyl-7-(1-methyl-1H-pyrrol-2-yl)-2,4-dioxo-1,2,3,4-tetrahydropyrido[2,3-d]pyrimidine-6-carbonitrile (A3).

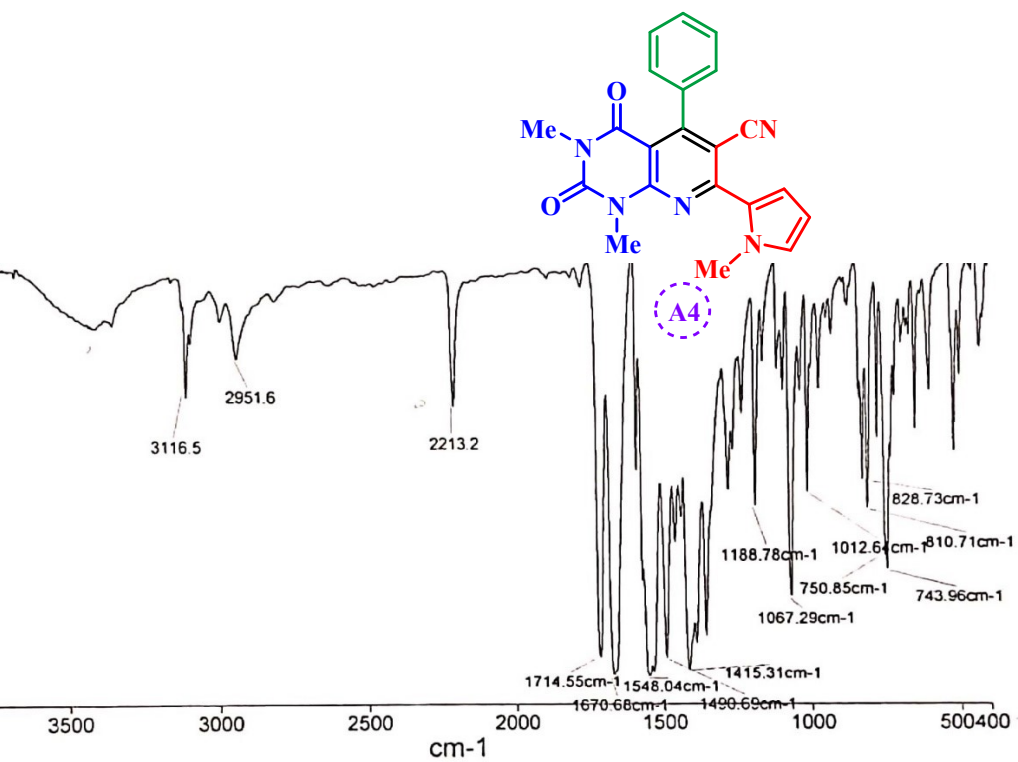

*FT-IR spectrum of 1,3-dimethyl-7-(1-methyl-1H-pyrrol-2-yl)-2,4-dioxo-5-phenyl-1,2,3,4-tetrahydropyrido[2,3-d]pyrimidine-6-carbonitrile (A4).*

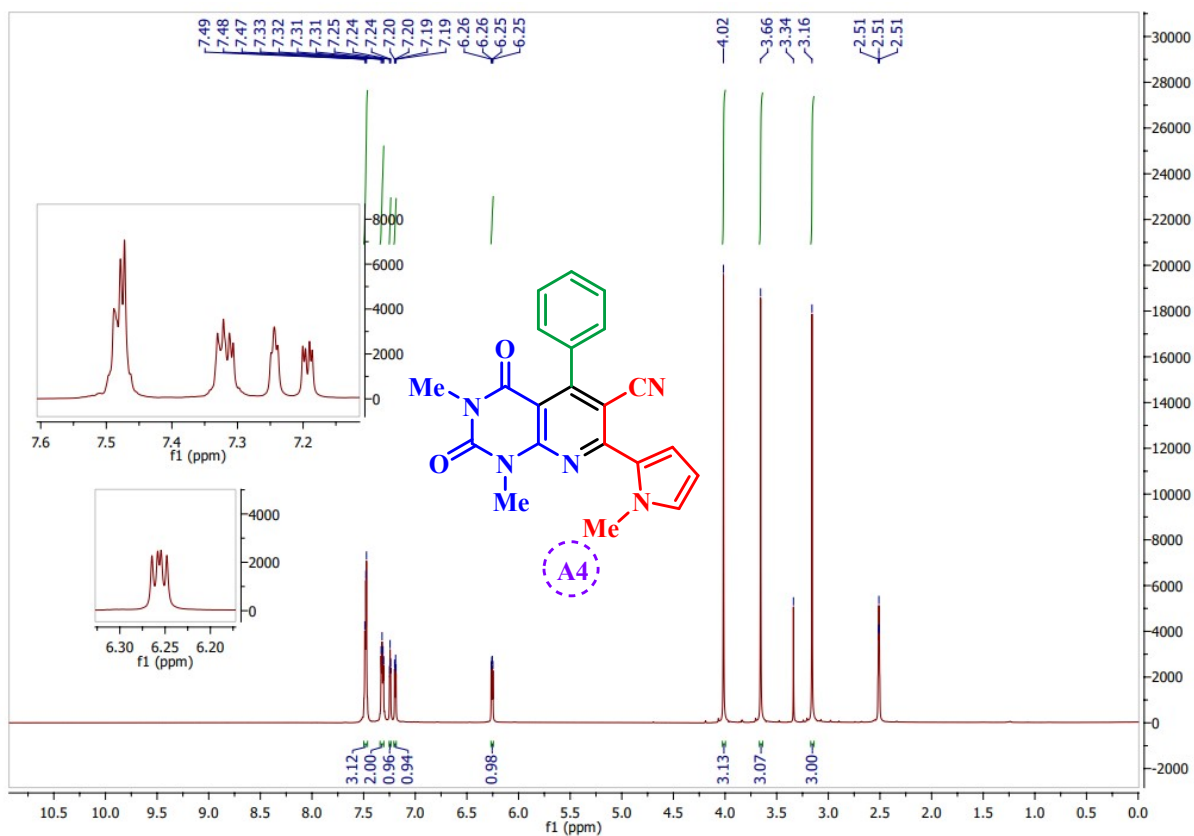

$^1\text{H-NMR}$  spectrum of 1,3-dimethyl-7-(1-methyl-1H-pyrrol-2-yl)-2,4-dioxo-5-phenyl-1,2,3,4-tetrahydropyrido[2,3-d]pyrimidine-6-carbonitrile (**A4**).

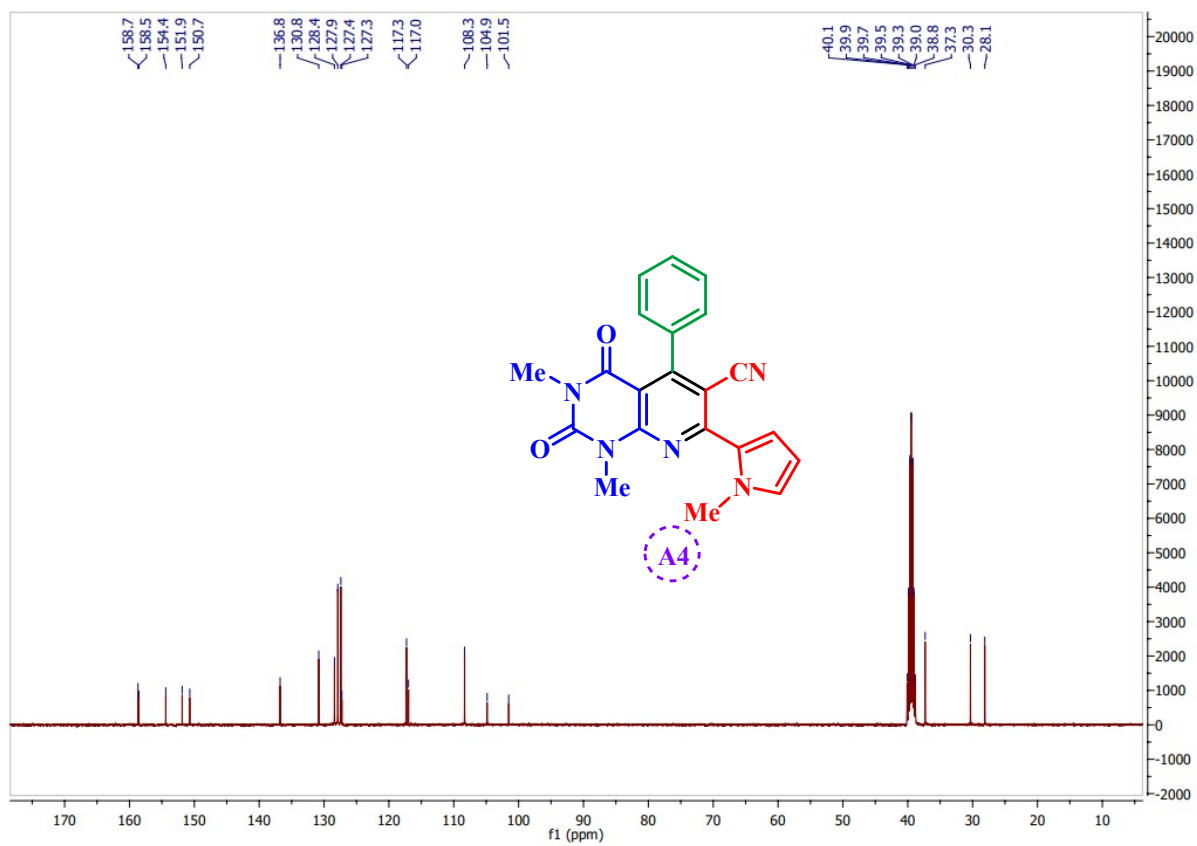

$^{13}\text{C}$ -NMR spectrum of 1,3-dimethyl-7-(1-methyl-1H-pyrrol-2-yl)-2,4-dioxo-5-phenyl-1,2,3,4-tetrahydropyrido[2,3-d]pyrimidine-6-carbonitrile (A4).

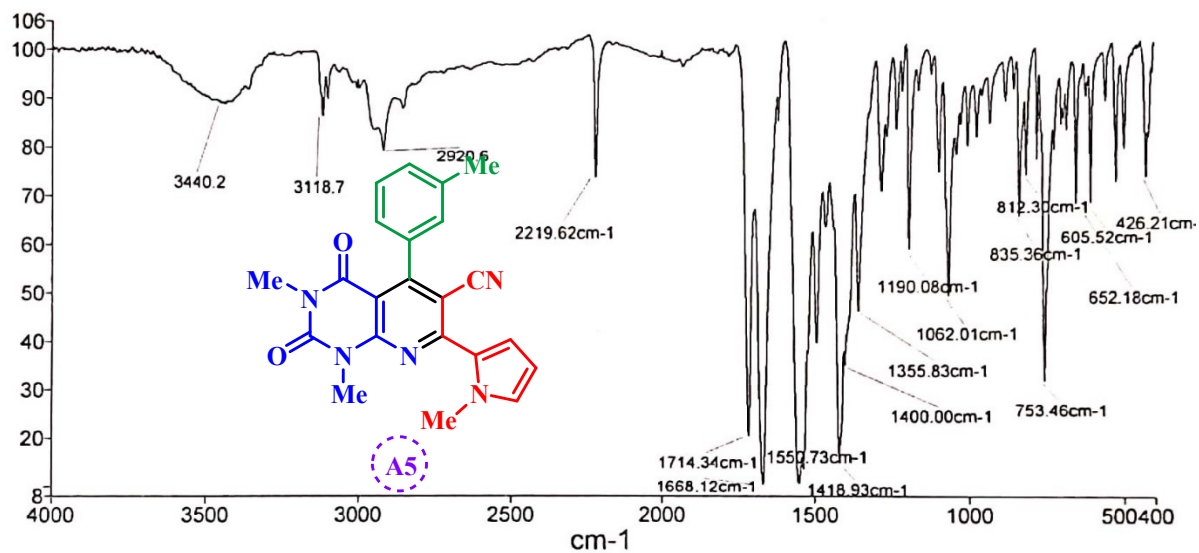

FT-IR spectrum of 1,3-dimethyl-7-(1-methyl-1H-pyrrol-2-yl)-2,4-dioxo-5-(m-tolyl)-1,2,3,4-tetrahydropyrido[2,3-d]pyrimidine-6-carbonitrile (A5).

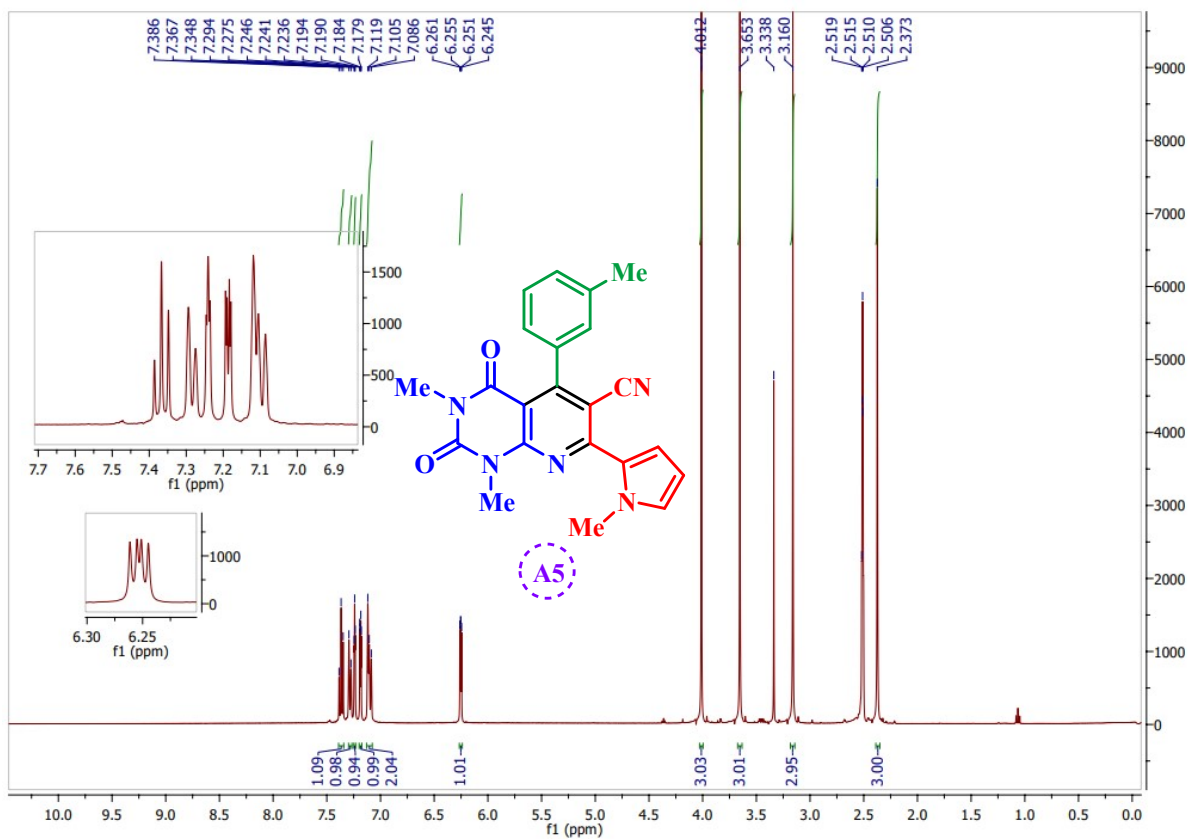

*<sup>1</sup>H-NMR spectrum of 1,3-dimethyl-7-(1-methyl-1H-pyrrol-2-yl)-2,4-dioxo-5-(m-tolyl)-1,2,3,4-tetrahydropyrido[2,3-d]pyrimidine-6-carbonitrile (A5).*

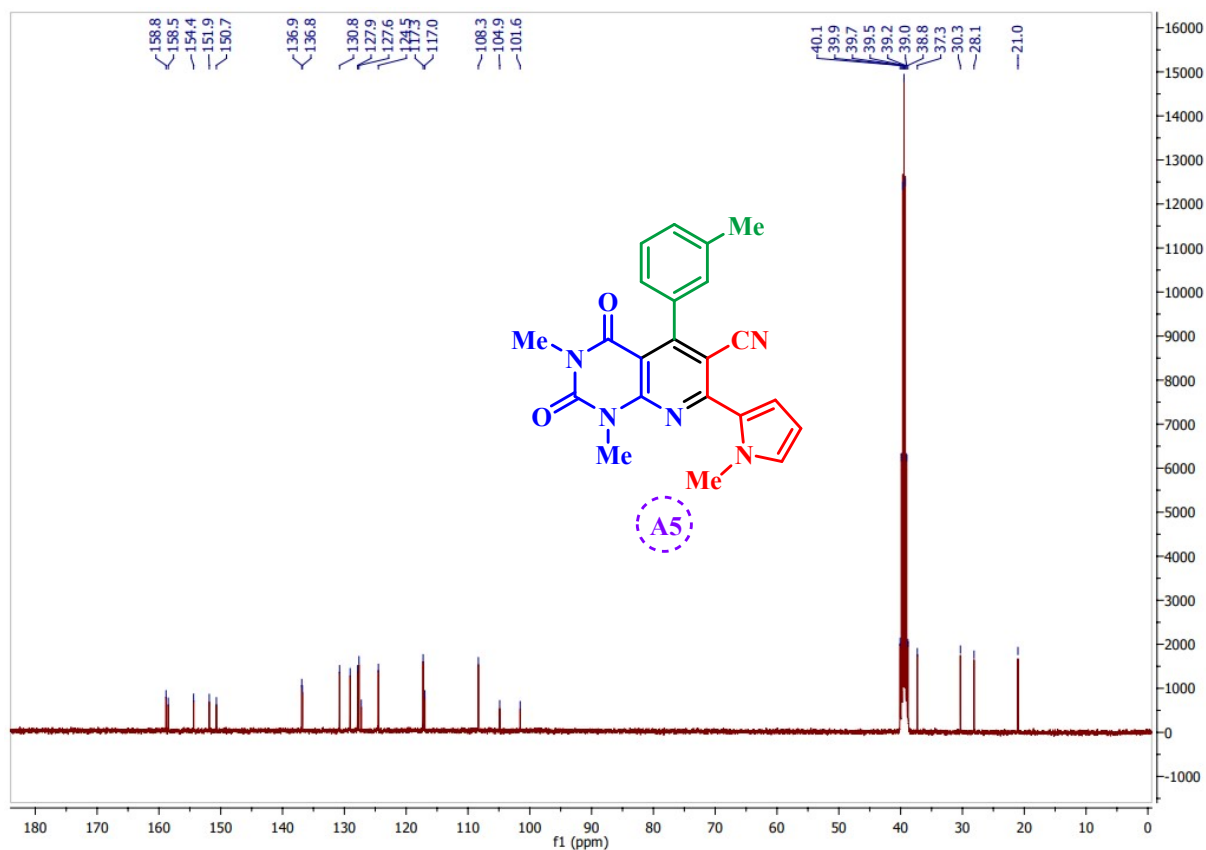

$^{13}\text{C-NMR}$  spectrum of 1,3-dimethyl-7-(1-methyl-1H-pyrrol-2-yl)-2,4-dioxo-5-(m-tolyl)-1,2,3,4-tetrahydropyrido[2,3-d]pyrimidine-6-carbonitrile (A5).



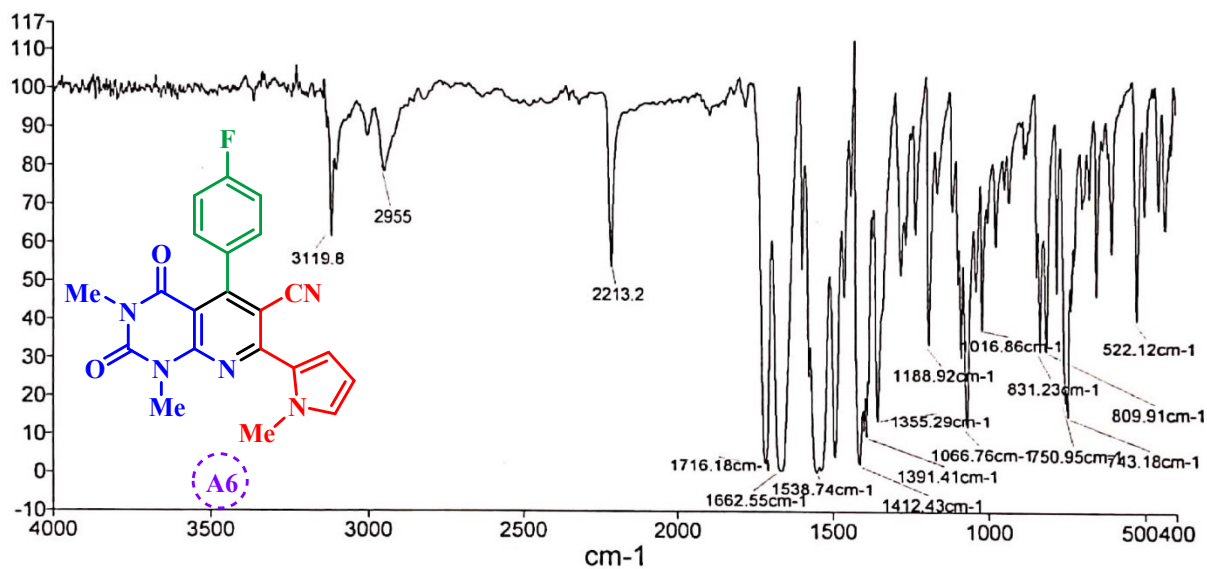

*FT-IR spectrum of 5-(4-fluorophenyl)-1,3-dimethyl-7-(1-methyl-1H-pyrrol-2-yl)-2,4-dioxo-1,2,3,4-tetrahydropyrido[2,3-d]pyrimidine-6-carbonitrile (A6).*

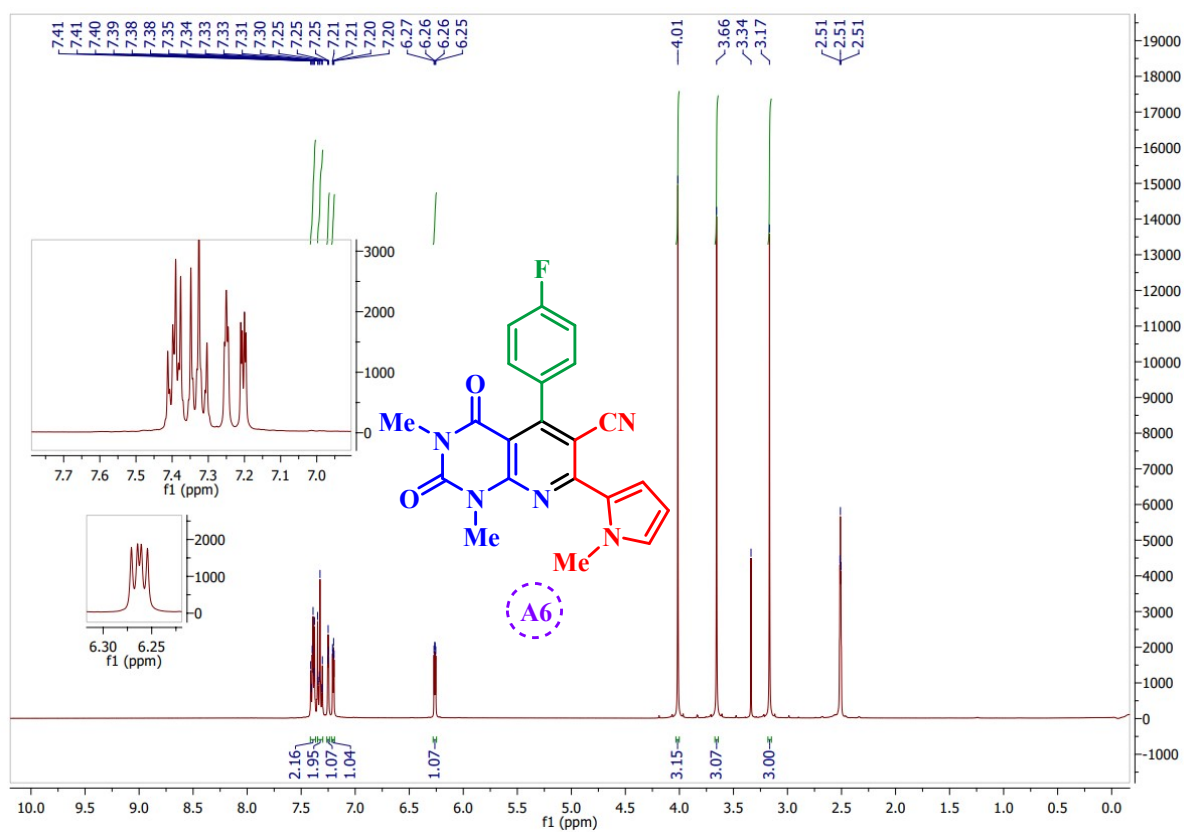

*<sup>1</sup>H-NMR spectrum of 5-(4-fluorophenyl)-1,3-dimethyl-7-(1-methyl-1H-pyrrol-2-yl)-2,4-dioxo-1,2,3,4-tetrahydropyrido[2,3-d]pyrimidine-6-carbonitrile (A6).*

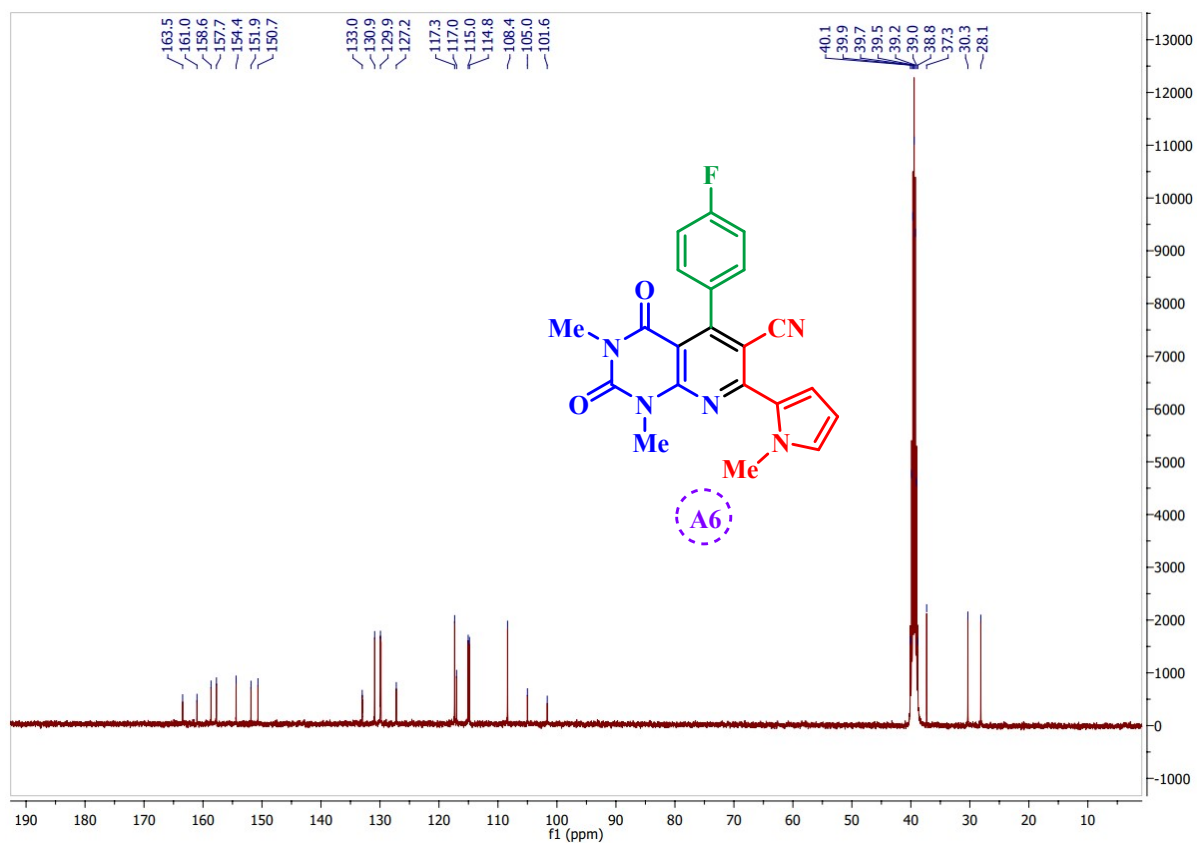

$^{13}\text{C}$ -NMR spectrum of 5-(4-fluorophenyl)-1,3-dimethyl-7-(1-methyl-1H-pyrrol-2-yl)-2,4-dioxo-1,2,3,4-tetrahydropyrido[2,3-d]pyrimidine-6-carbonitrile (A6).

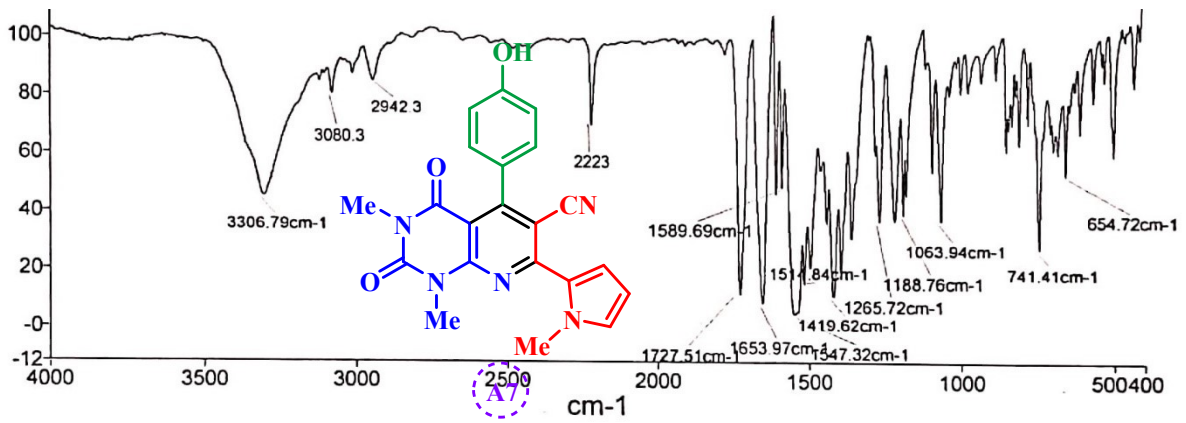

FT-IR spectrum of 5-(4-hydroxyphenyl)-1,3-dimethyl-7-(1-methyl-1H-pyrrol-2-yl)-2,4-dioxo-1,2,3,4-tetrahydropyrido[2,3-d]pyrimidine-6-carbonitrile (A7).

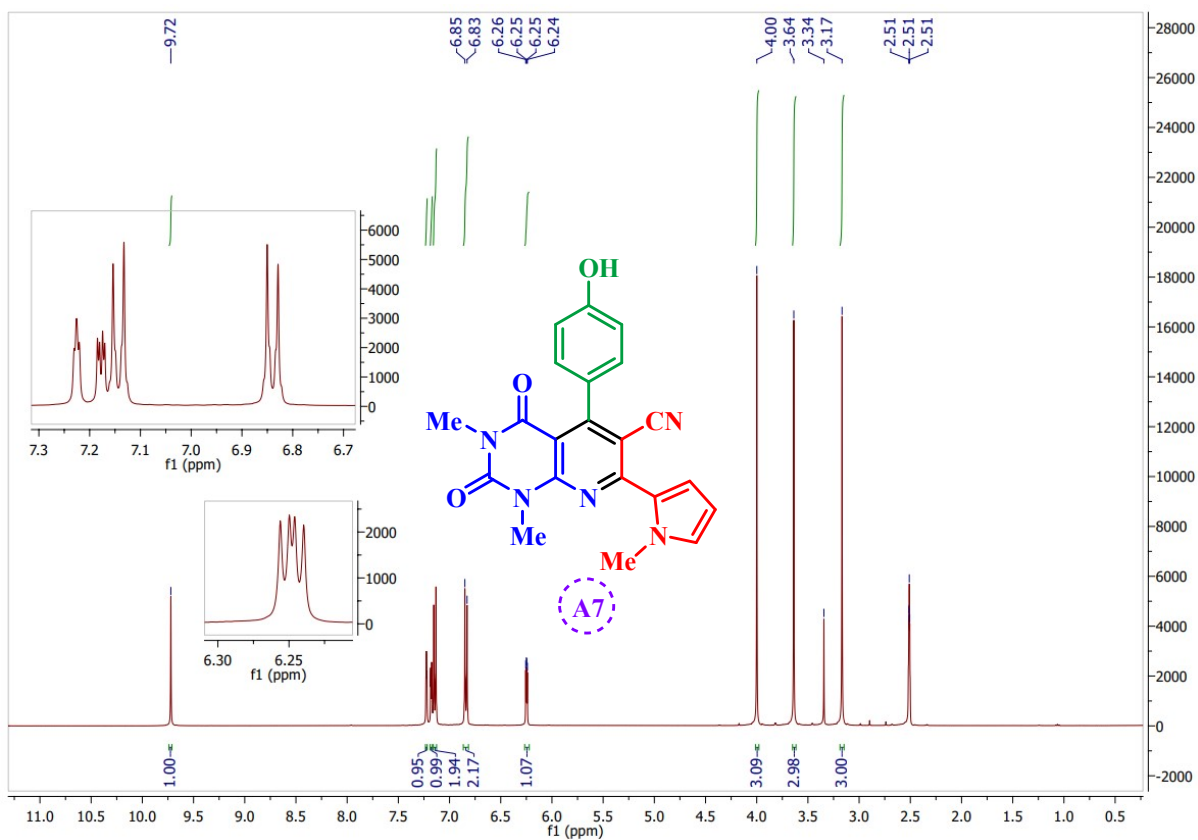

$^1\text{H-NMR}$  spectrum of 5-(4-hydroxyphenyl)-1,3-dimethyl-7-(1-methyl-1H-pyrrol-2-yl)-2,4-dioxo-1,2,3,4-tetrahydropyrido[2,3-d]pyrimidine-6-carbonitrile (A7).

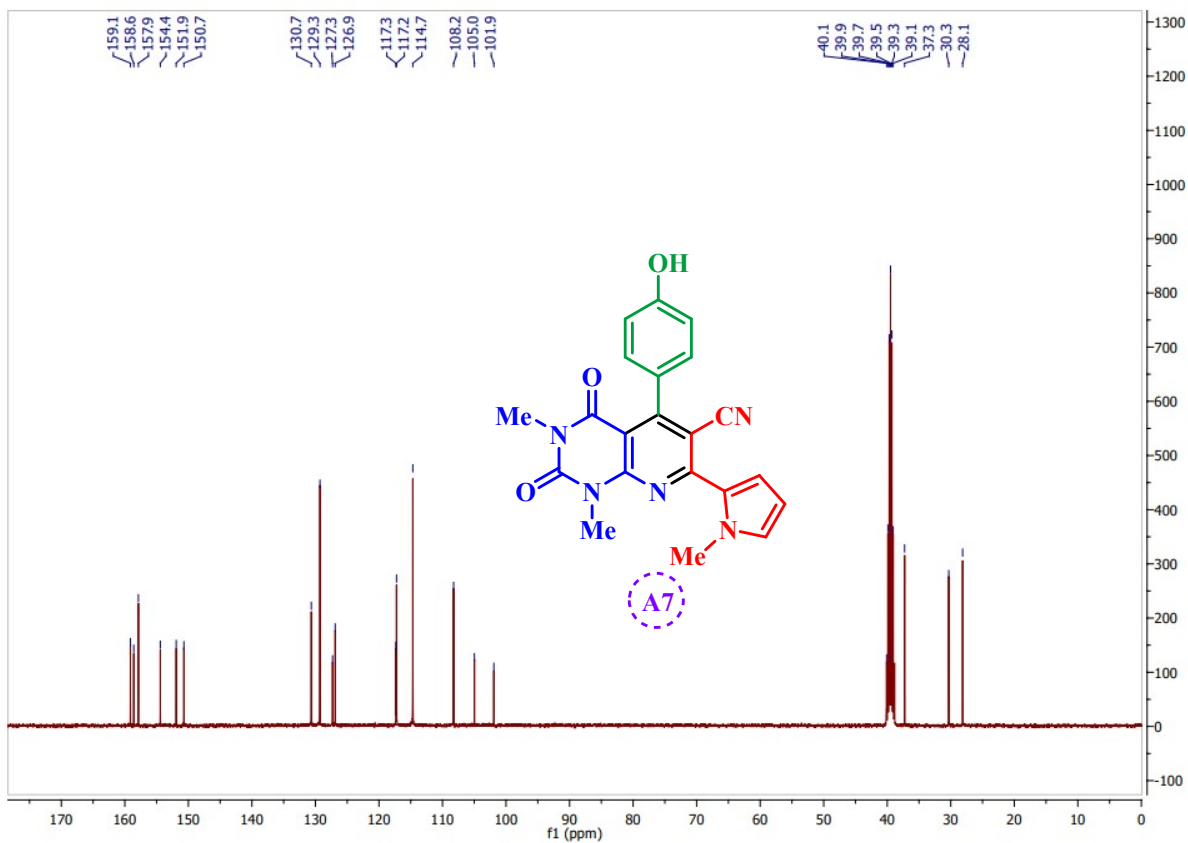

$^{13}\text{C}$ -NMR spectrum of 5-(4-hydroxyphenyl)-1,3-dimethyl-7-(1-methyl-1H-pyrrol-2-yl)-2,4-dioxo-1,2,3,4-tetrahyrido[2,3-d]pyrimidine-6-carbonitrile (A7).

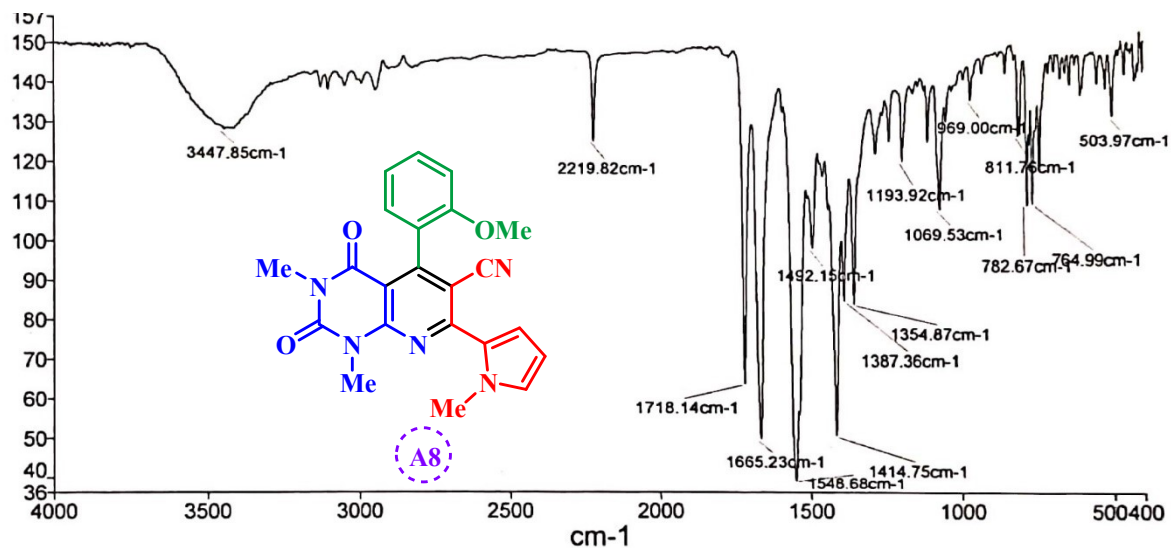

*FT-IR spectrum of 5-(2-methoxyphenyl)-1,3-dimethyl-7-(1-methyl-1H-pyrrol-2-yl)-2,4-dioxo-1,2,3,4-tetrahydropyrido[2,3-d]pyrimidine-6-carbonitrile (A8).*

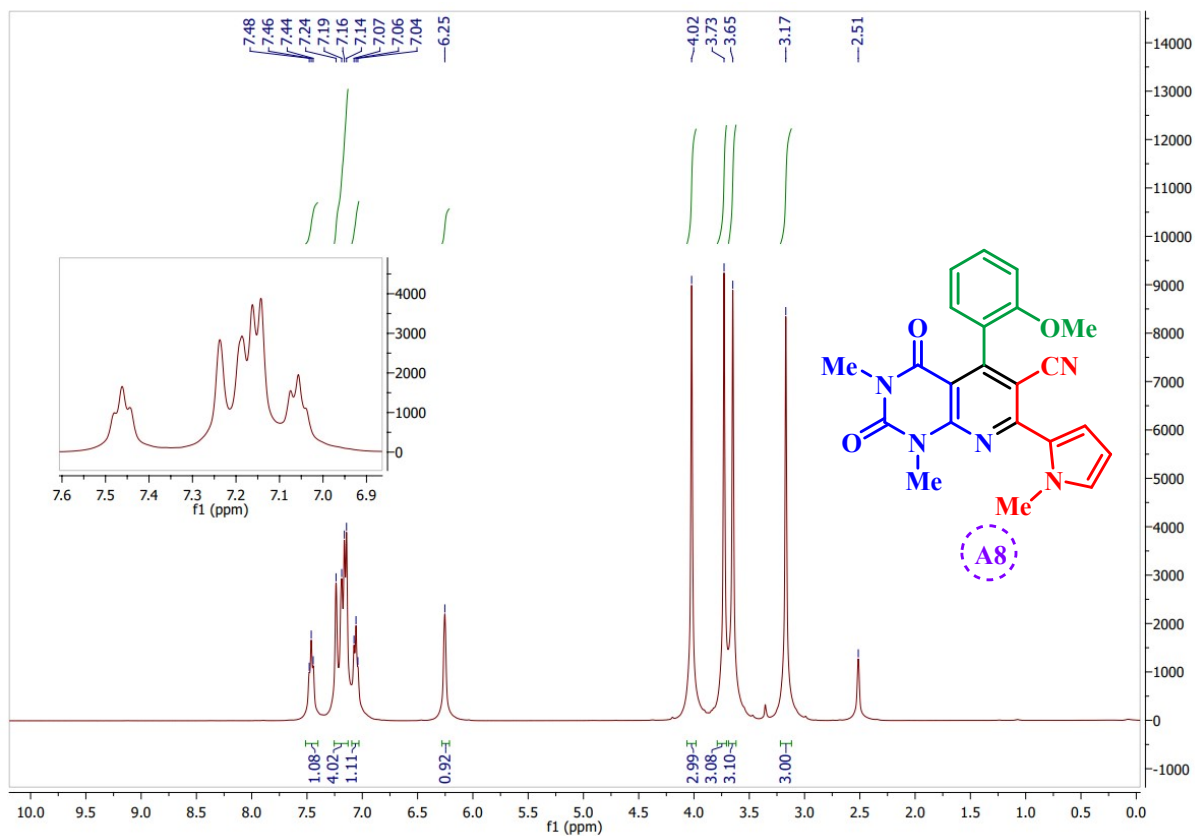

*<sup>1</sup>H-NMR spectrum of 5-(2-methoxyphenyl)-1,3-dimethyl-7-(1-methyl-1H-pyrrol-2-yl)-2,4-dioxo-1,2,3,4-tetrahydropyrido[2,3-d]pyrimidine-6-carbonitrile (A8).*



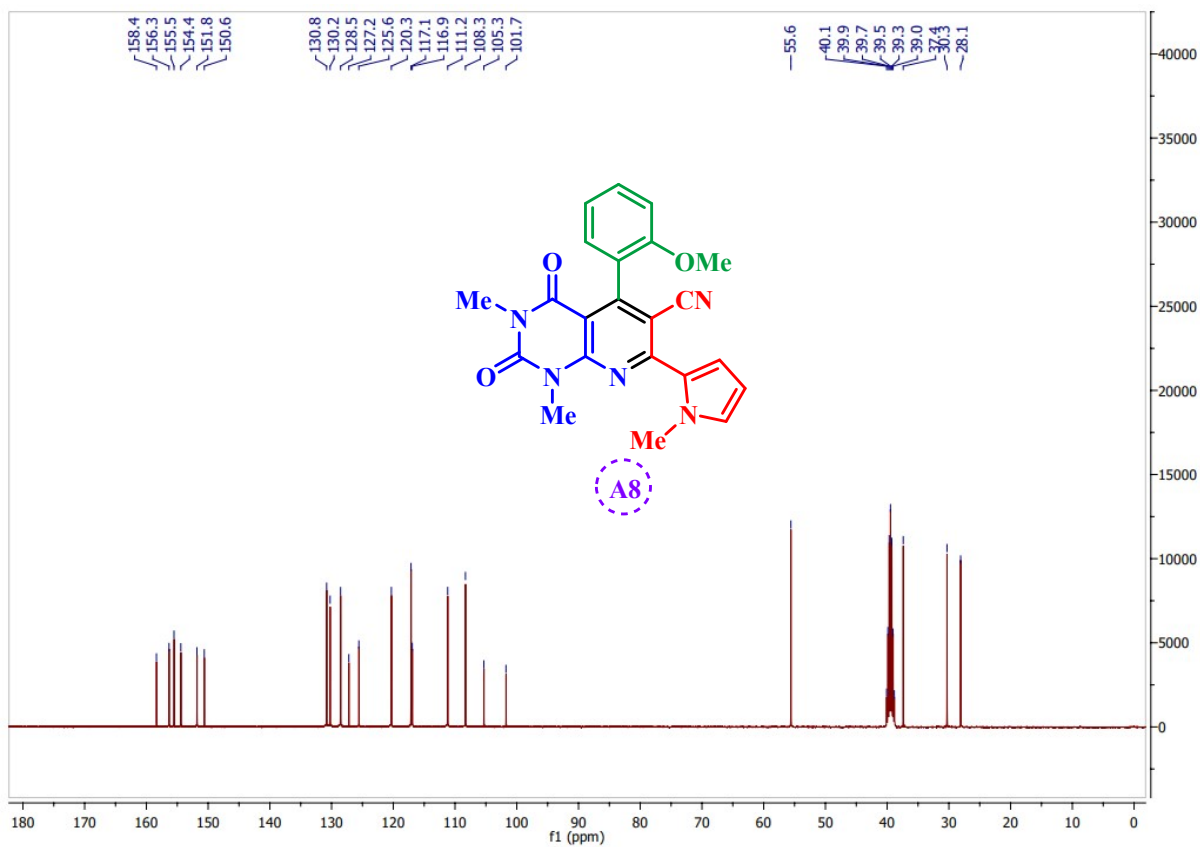

$^{13}\text{C}$ -NMR spectrum of 5-(2-methoxyphenyl)-1,3-dimethyl-7-(1-methyl-1H-pyrrol-2-yl)-2,4-dioxo-1,2,3,4-tetrahydropyrido[2,3-d]pyrimidine-6-carbonitrile (A8).

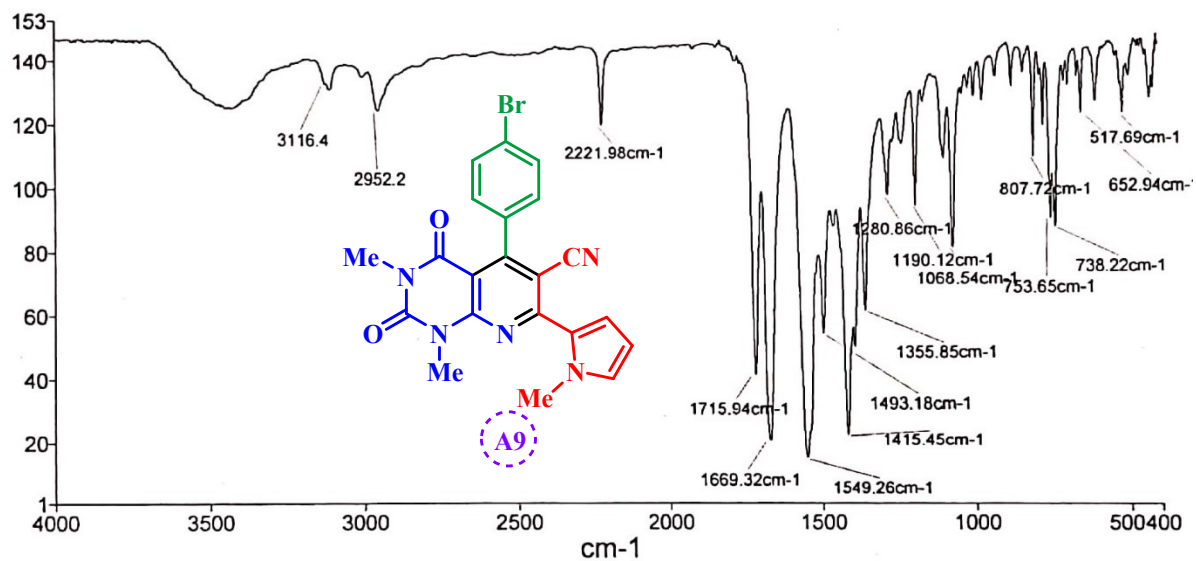

FT-IR spectrum of 5-(4-bromophenyl)-1,3-dimethyl-7-(1-methyl-1H-pyrrol-2-yl)-2,4-dioxo-1,2,3,4-tetrahydropyrido[2,3-d]pyrimidine-6-carbonitrile (A9).

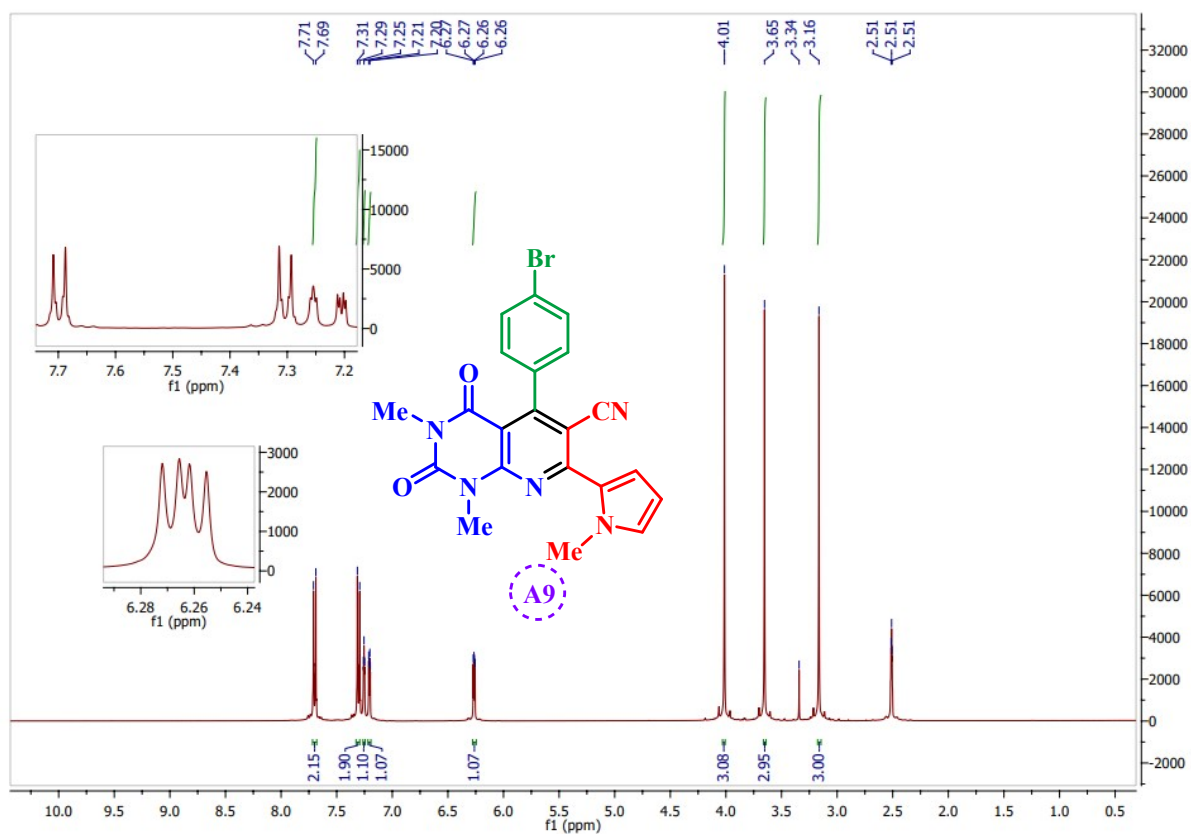

<sup>1</sup>H-NMR spectrum of 5-(4-bromophenyl)-1,3-dimethyl-7-(1-methyl-1H-pyrrol-2-yl)-2,4-dioxo-1,2,3,4-tetrahydropyrido[2,3-d]pyrimidine-6-carbonitrile (A9).

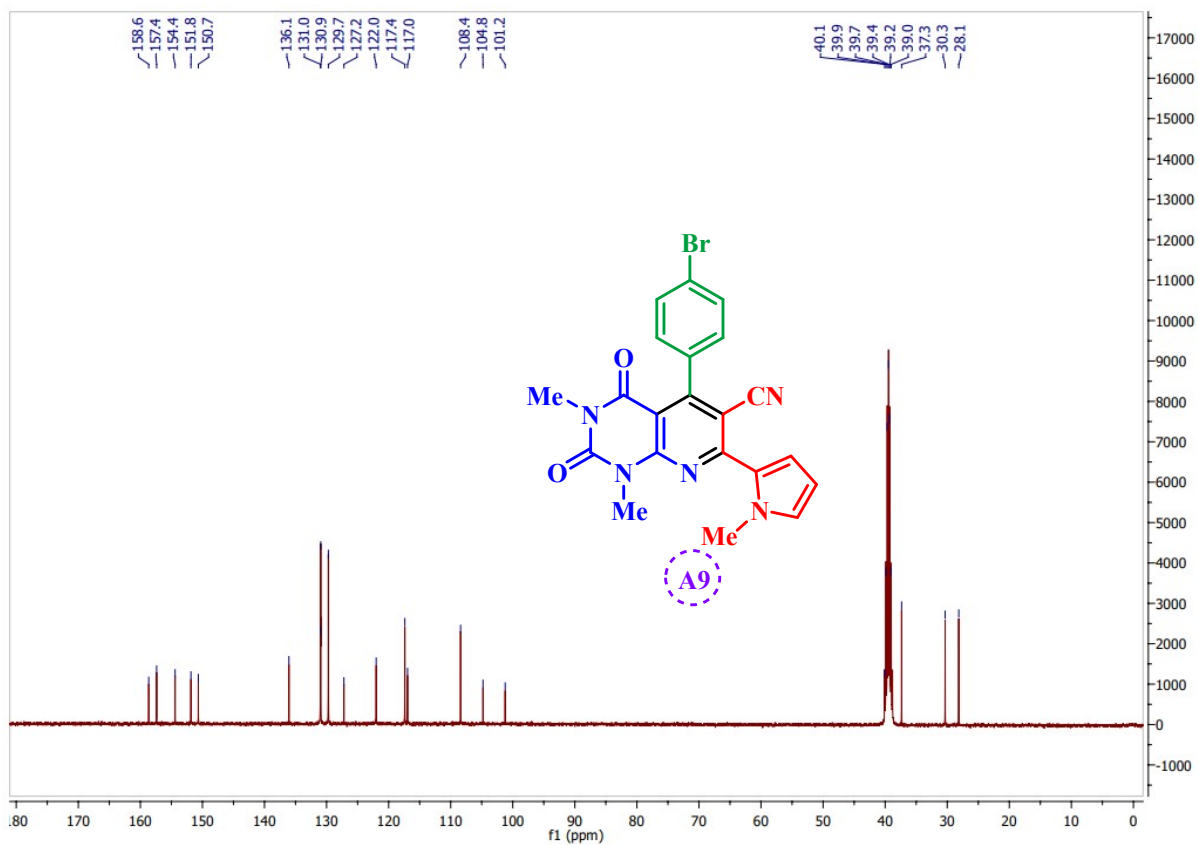

$^{13}\text{C-NMR}$  spectrum of 5-(4-bromophenyl)-1,3-dimethyl-7-(1-methyl-1H-pyrrol-2-yl)-2,4-dioxo-1,2,3,4-tetrahydropyrido[2,3-d]pyrimidine-6-carbonitrile (A9).

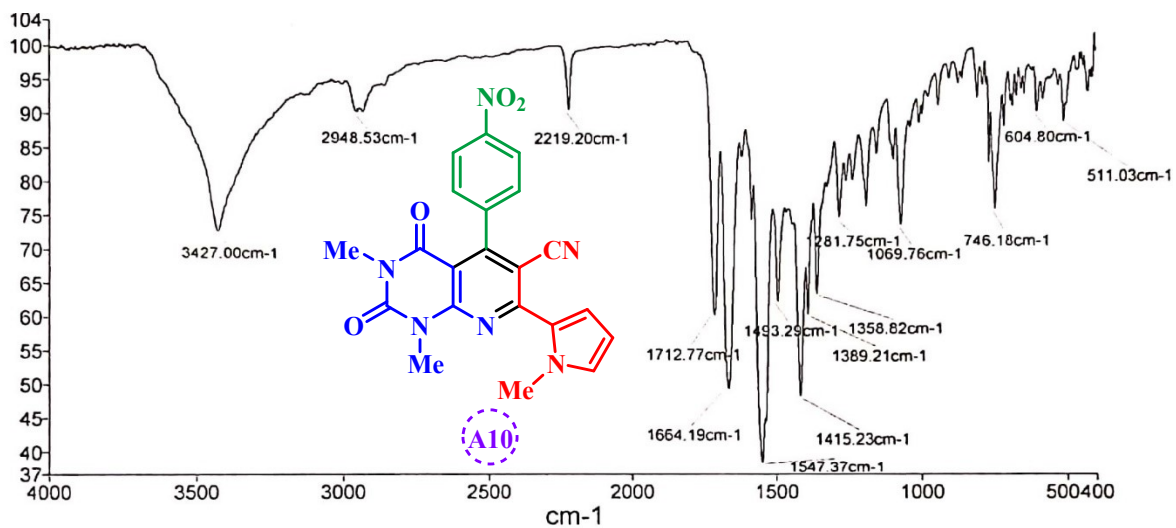

FT-IR spectrum of 1,3-dimethyl-7-(1-methyl-1H-pyrrol-2-yl)-5-(4-nitrophenyl)-2,4-dioxo-1,2,3,4-tetrahydropyrido[2,3-d]pyrimidine-6-carbonitrile (A10).

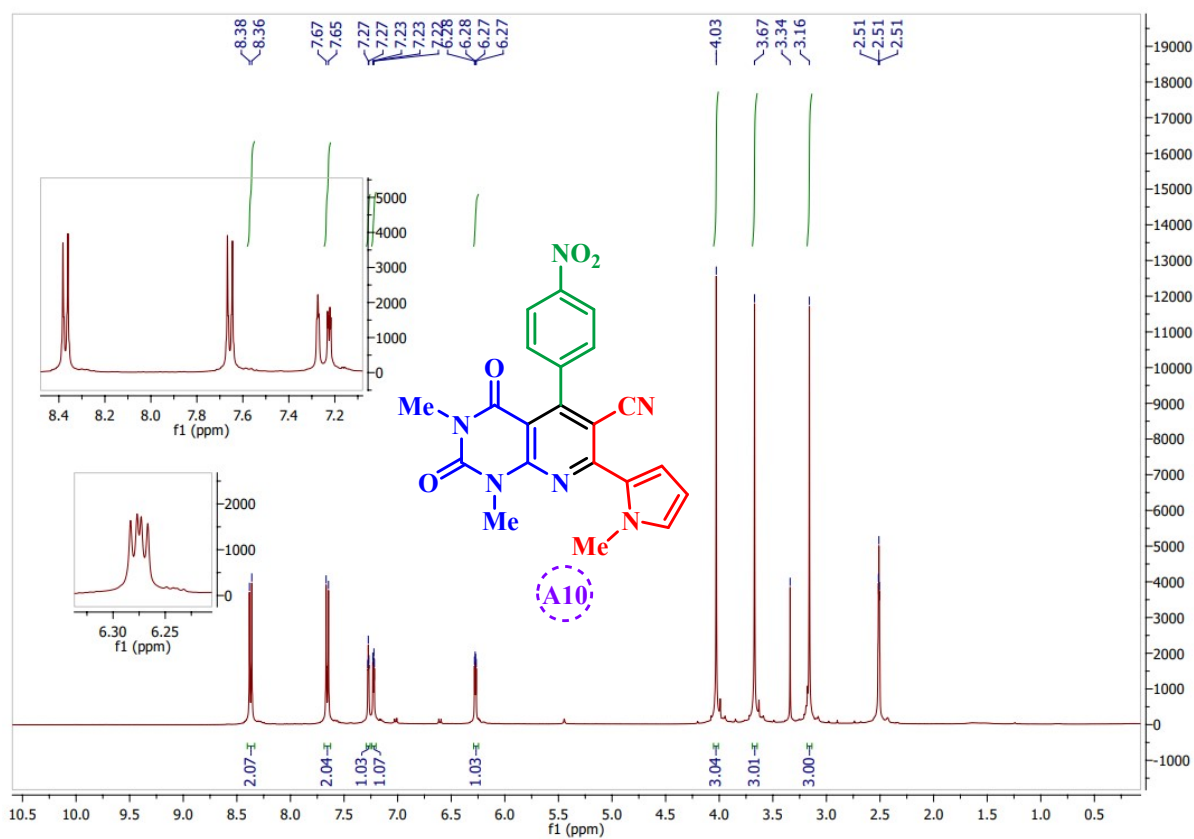

<sup>1</sup>H-NMR spectrum of 1,3-dimethyl-7-(1-methyl-1H-pyrrol-2-yl)-5-(4-nitrophenyl)-2,4-dioxo-1,2,3,4-tetrahydropyrido[2,3-d]pyrimidine-6-carbonitrile (**A10**).

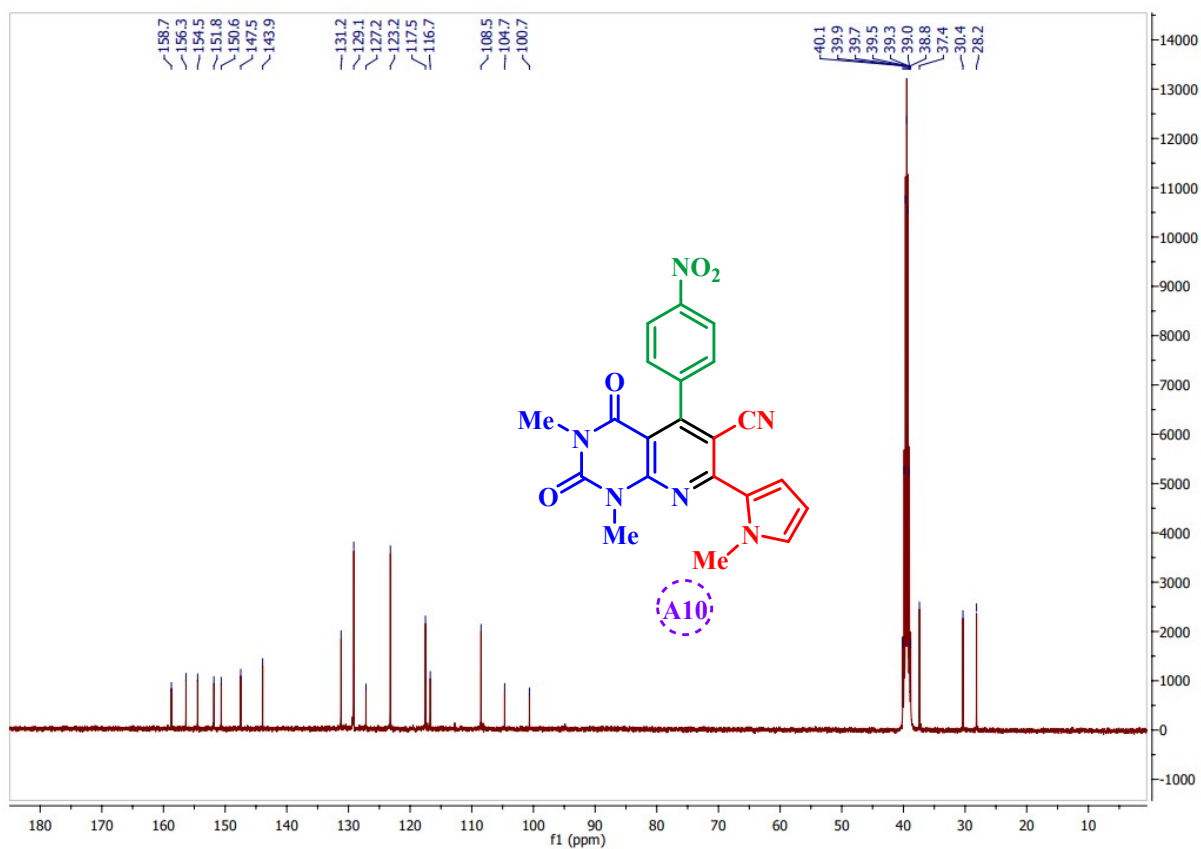

$^{13}\text{C-NMR}$  spectrum of 1,3-dimethyl-7-(1-methyl-1H-pyrrol-2-yl)-5-(4-nitrophenyl)-2,4-dioxo-1,2,3,4-tetrahydropyrido[2,3-d]pyrimidine-6-carbonitrile (A10).

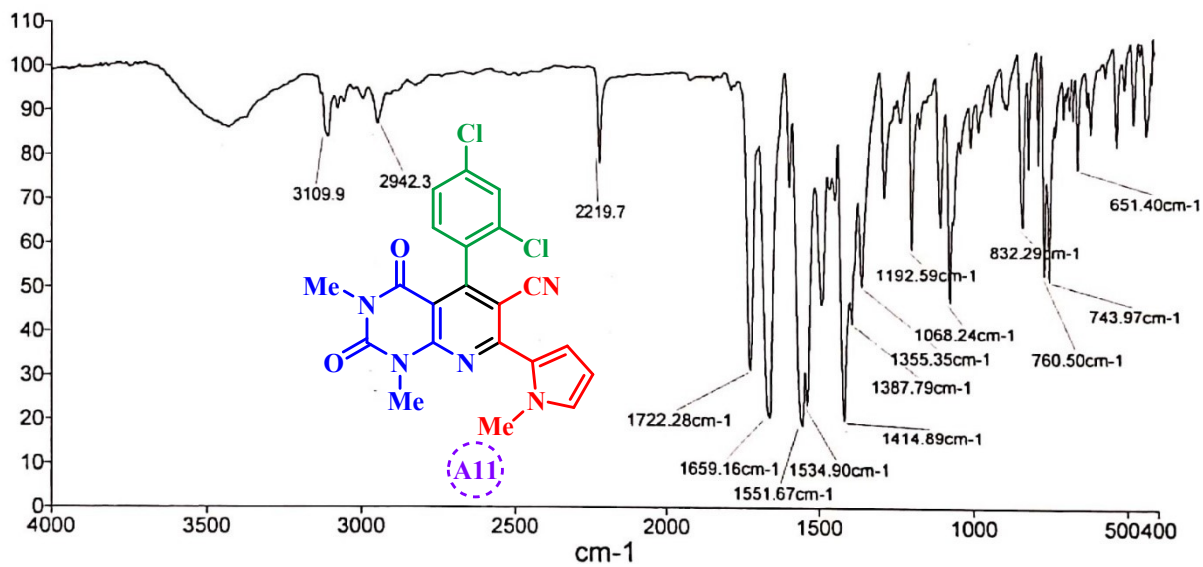

*FT-IR spectrum of 5-(2,4-dichlorophenyl)-1,3-dimethyl-7-(1-methyl-1H-pyrrol-2-yl)-2,4-dioxo-1,2,3,4-tetrahydropyrido[2,3-d]pyrimidine-6-carbonitrile (A11).*



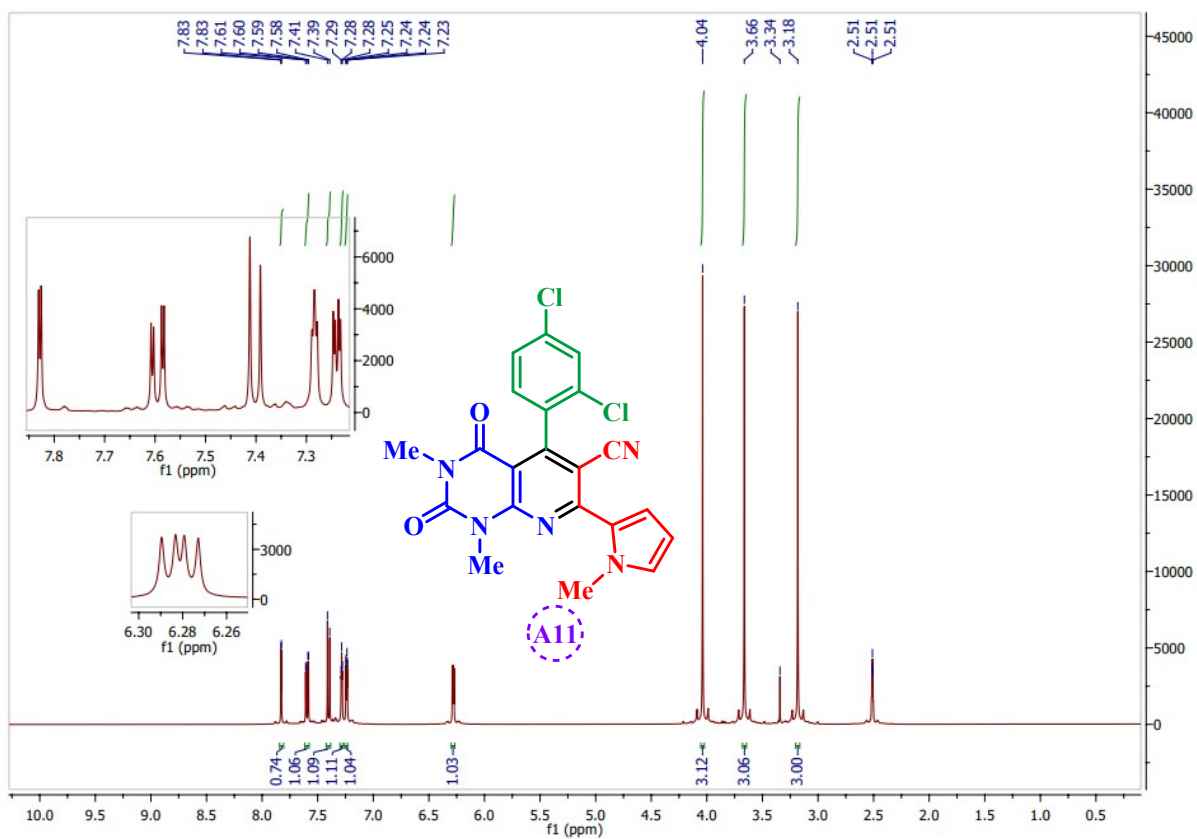

$^1\text{H-NMR}$  spectrum of 5-(2,4-dichlorophenyl)-1,3-dimethyl-7-(1-methyl-1H-pyrrol-2-yl)-2,4-dioxo-1,2,3,4-tetrahydropyrido[2,3-d]pyrimidine-6-carbonitrile (A11).

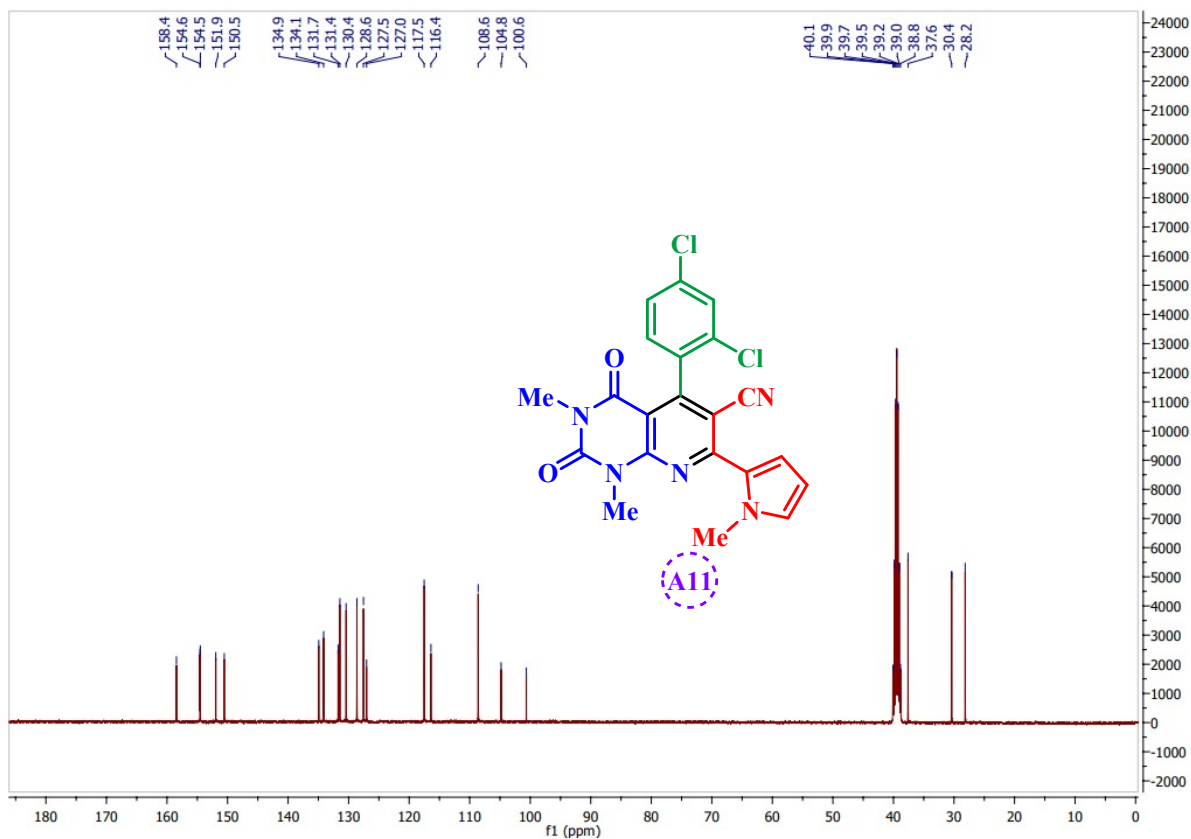

<sup>13</sup>C-NMR spectrum of 5-(2,4-dichlorophenyl)-1,3-dimethyl-7-(1-methyl-1H-pyrrol-2-yl)-2,4-dioxo-1,2,3,4-tetrahydropyrido[2,3-d]pyrimidine-6-carbonitrile (A11).

Tuesday, January 01, 2002 12:30 AM

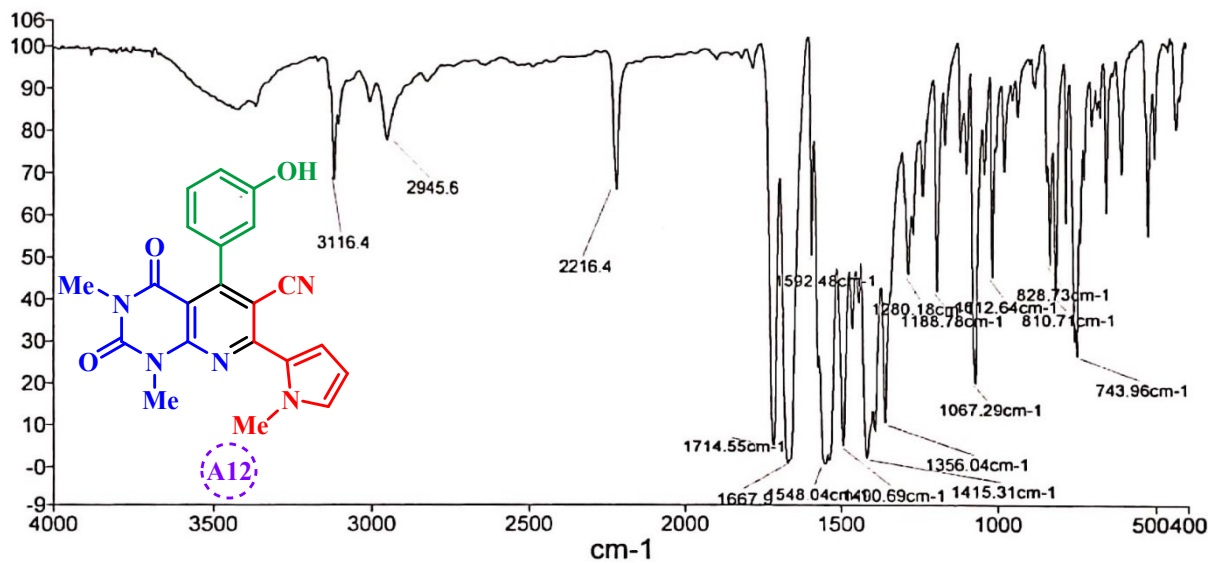

FT-IR spectrum of 5-(3-hydroxyphenyl)-1,3-dimethyl-7-(1-methyl-1H-pyrrol-2-yl)-2,4-dioxo-1,2,3,4-tetrahydropyrido[2,3-d]pyrimidine-6-carbonitrile (A12).

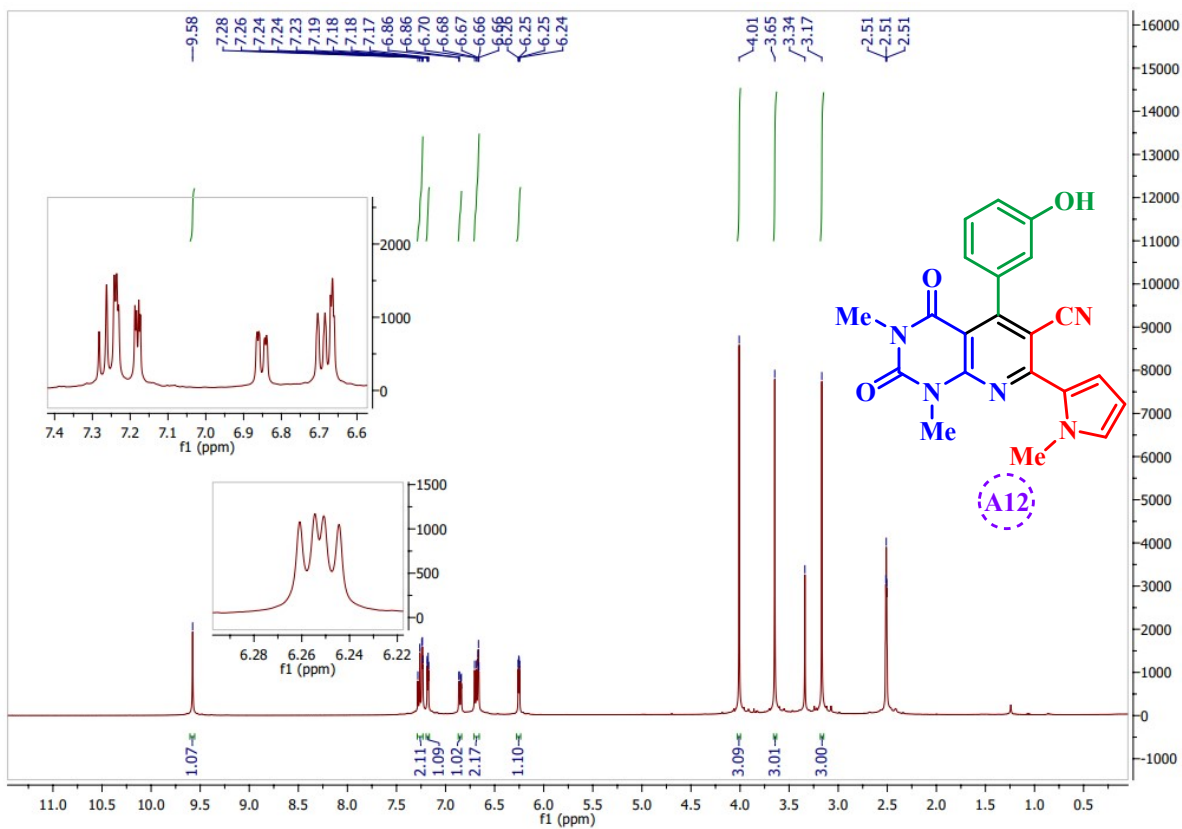

$^1\text{H-NMR}$  spectrum of 5-(3-hydroxyphenyl)-1,3-dimethyl-7-(1-methyl-1H-pyrrol-2-yl)-2,4-dioxo-1,2,3,4-tetrahydropyrido[2,3-d]pyrimidine-6-carbonitrile (A12).

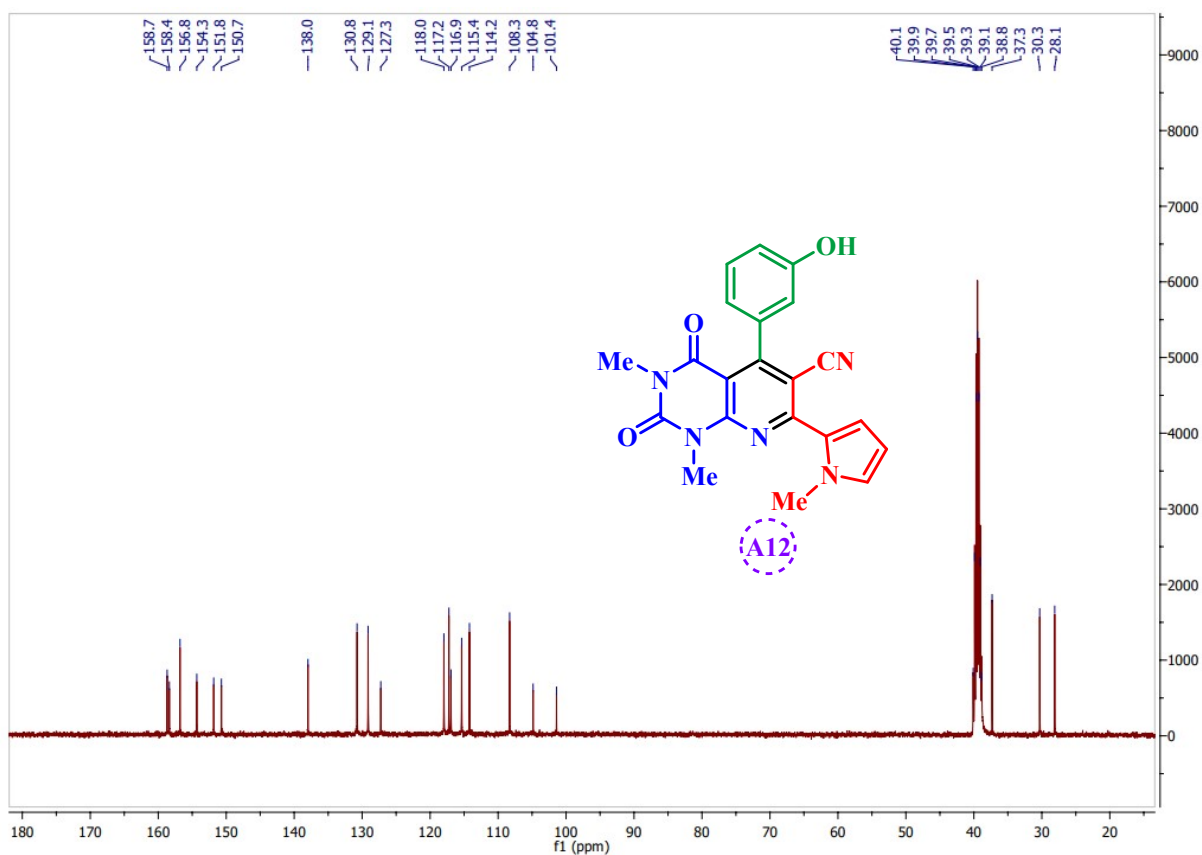

<sup>13</sup>C-NMR spectrum of 5-(3-hydroxyphenyl)-1,3-dimethyl-7-(1-methyl-1H-pyrrol-2-yl)-2,4-dioxo-1,2,3,4-tetrahydropyrido[2,3-d]pyrimidine-6-carbonitrile (A12).

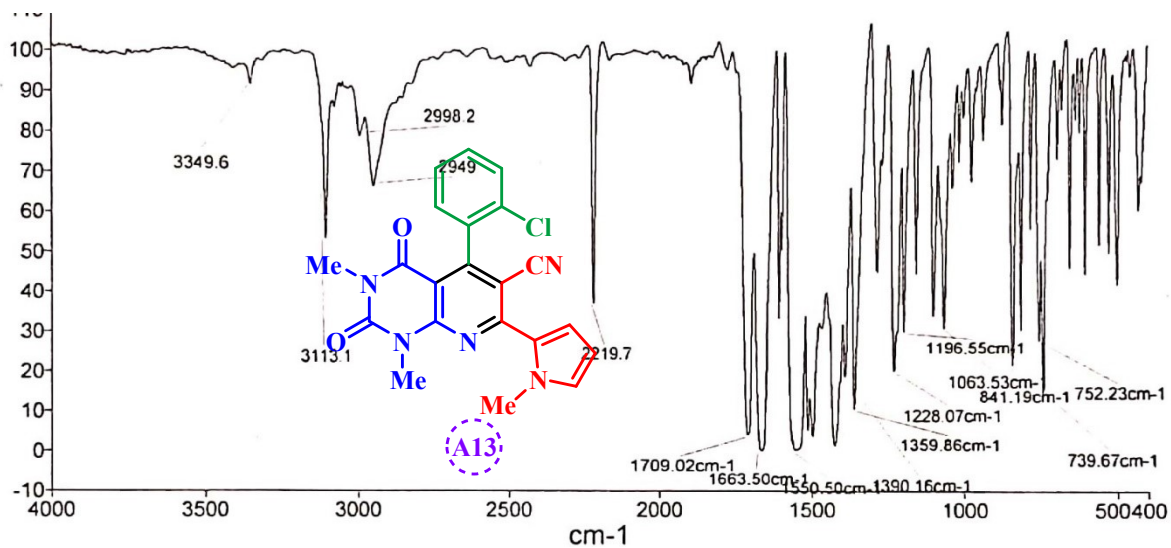

FT-IR spectrum of 5-(2-chlorophenyl)-1,3-dimethyl-7-(1-methyl-1H-pyrrol-2-yl)-2,4-dioxo-1,2,3,4-tetrahydropyrido[2,3-d]pyrimidine-6-carbonitrile (A13).

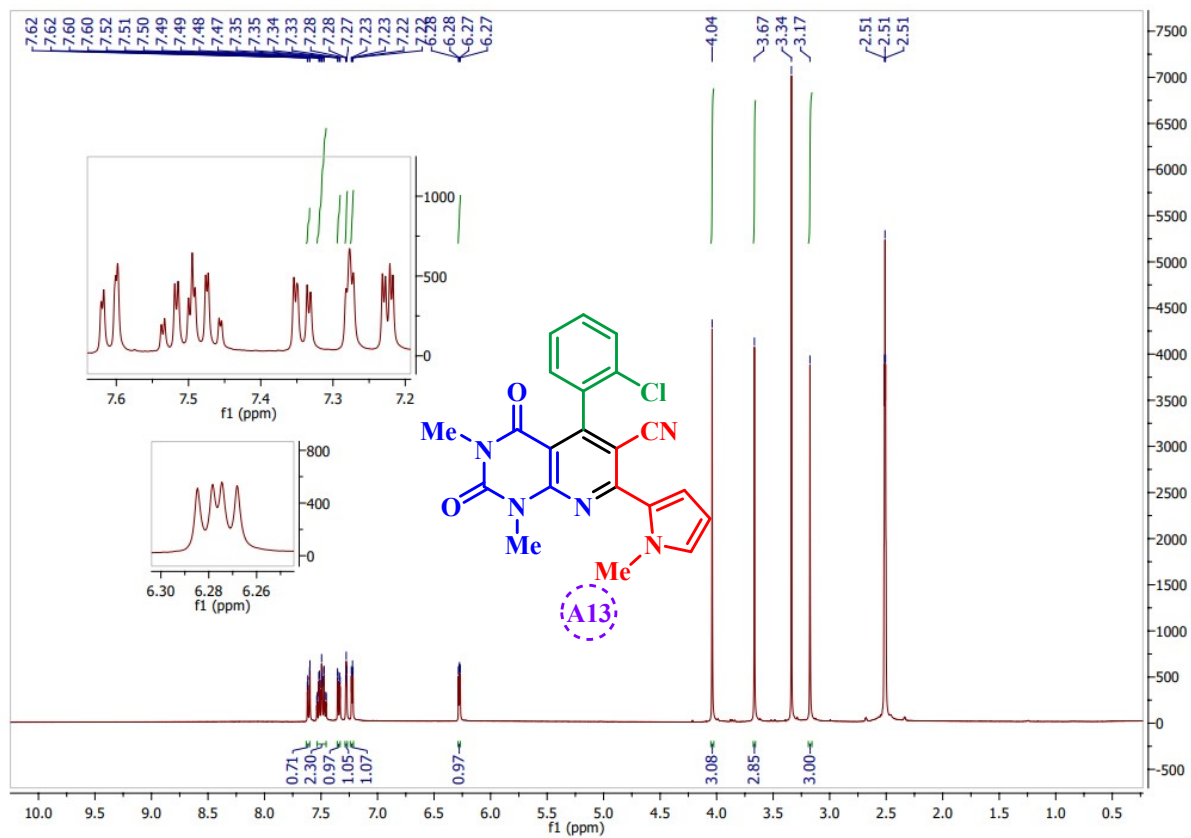

$^1\text{H-NMR}$  spectrum of 5-(2-chlorophenyl)-1,3-dimethyl-7-(1-methyl-1H-pyrrol-2-yl)-2,4-dioxo-1,2,3,4-tetrahydropyrido[2,3-d]pyrimidine-6-carbonitrile (A13).

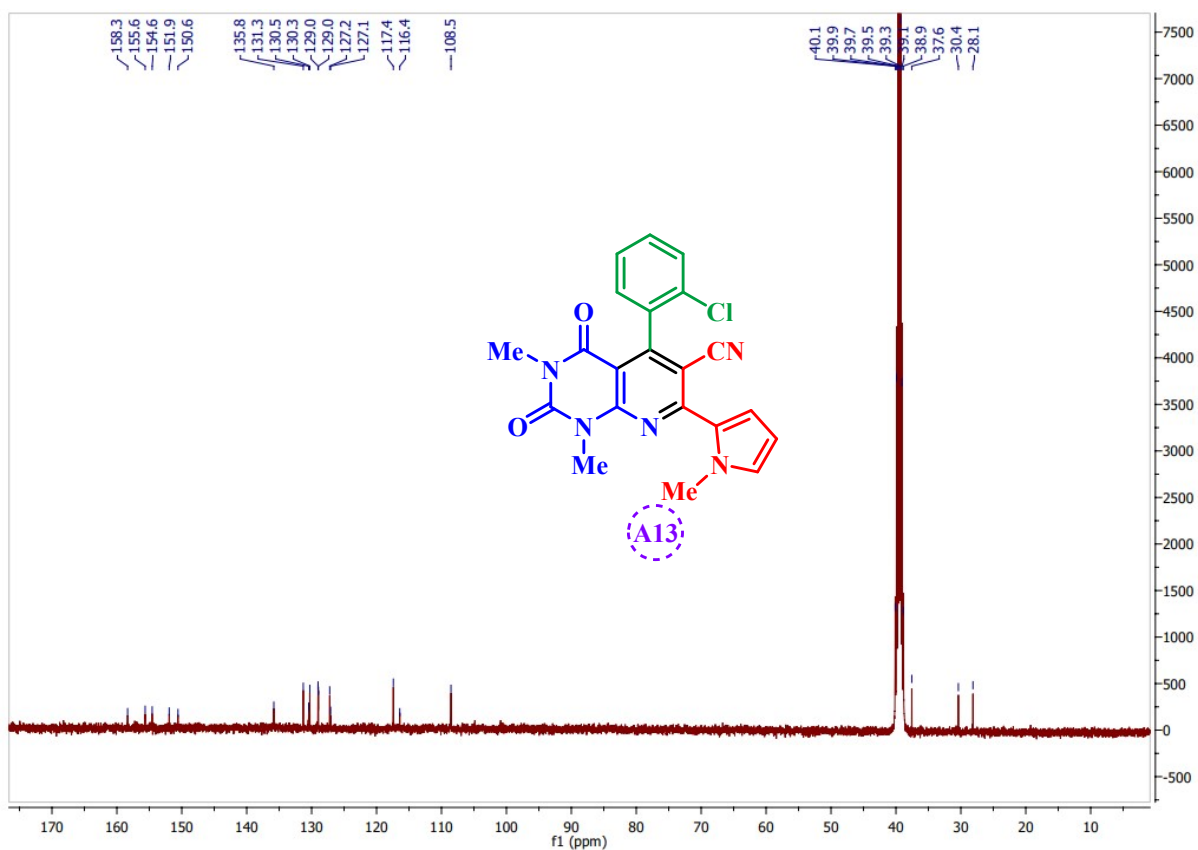

$^{13}\text{C}$ -NMR spectrum of 5-(2-chlorophenyl)-1,3-dimethyl-7-(1-methyl-1H-pyrrol-2-yl)-2,4-dioxo-1,2,3,4-tetrahydropyrido[2,3-d]pyrimidine-6-carbonitrile (A13).



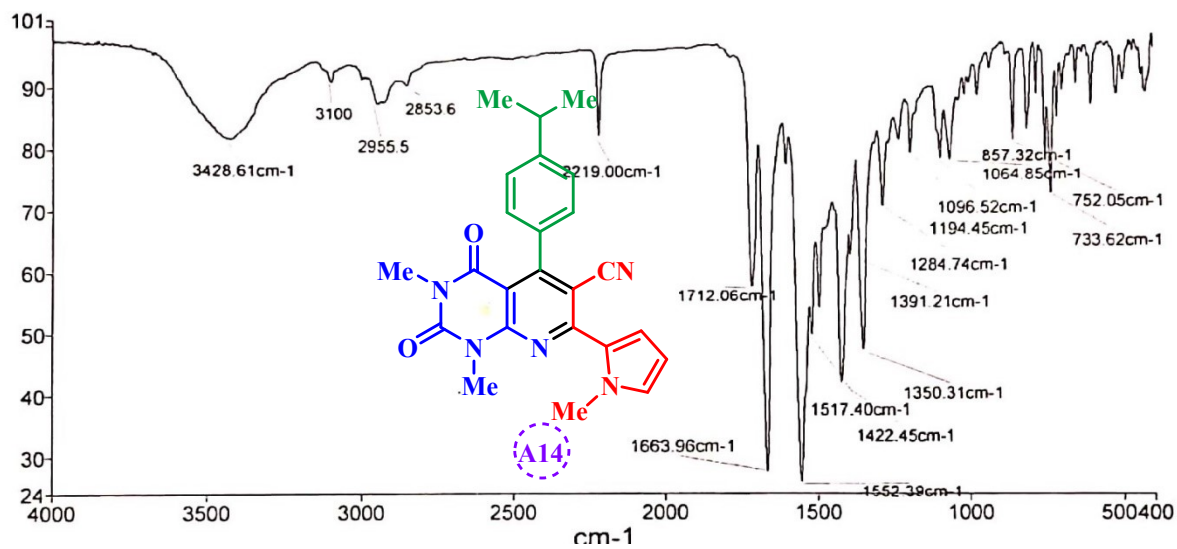

FT-IR spectrum of 5-(4-isopropylphenyl)-1,3-dimethyl-7-(1-methyl-1H-pyrrol-2-yl)-2,4-dioxo-1,2,3,4-tetrahydropyrido[2,3-d]pyrimidine-6-carbonitrile (A14).

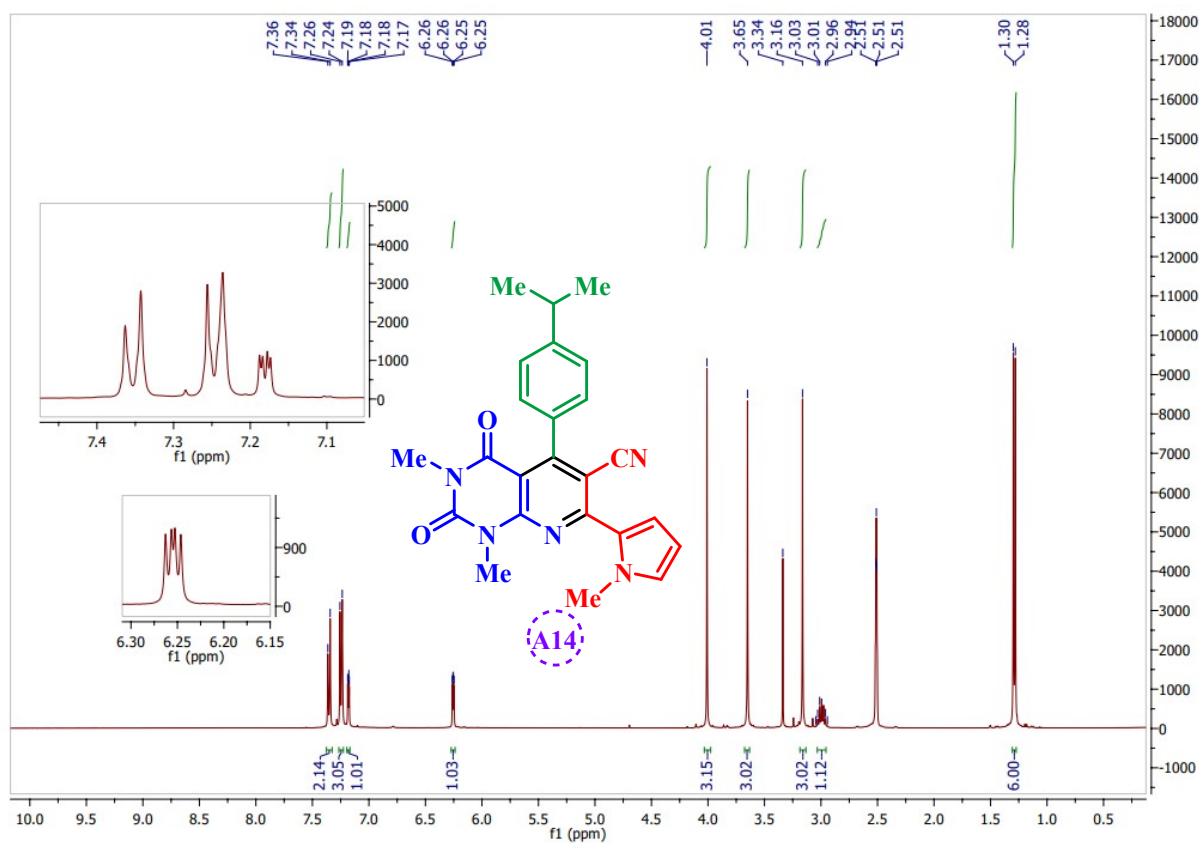

<sup>1</sup>H-NMR spectrum of 5-(4-isopropylphenyl)-1,3-dimethyl-7-(1-methyl-1H-pyrrol-2-yl)-2,4-dioxo-1,2,3,4-tetrahydropyrido[2,3-d]pyrimidine-6-carbonitrile (**A14**).

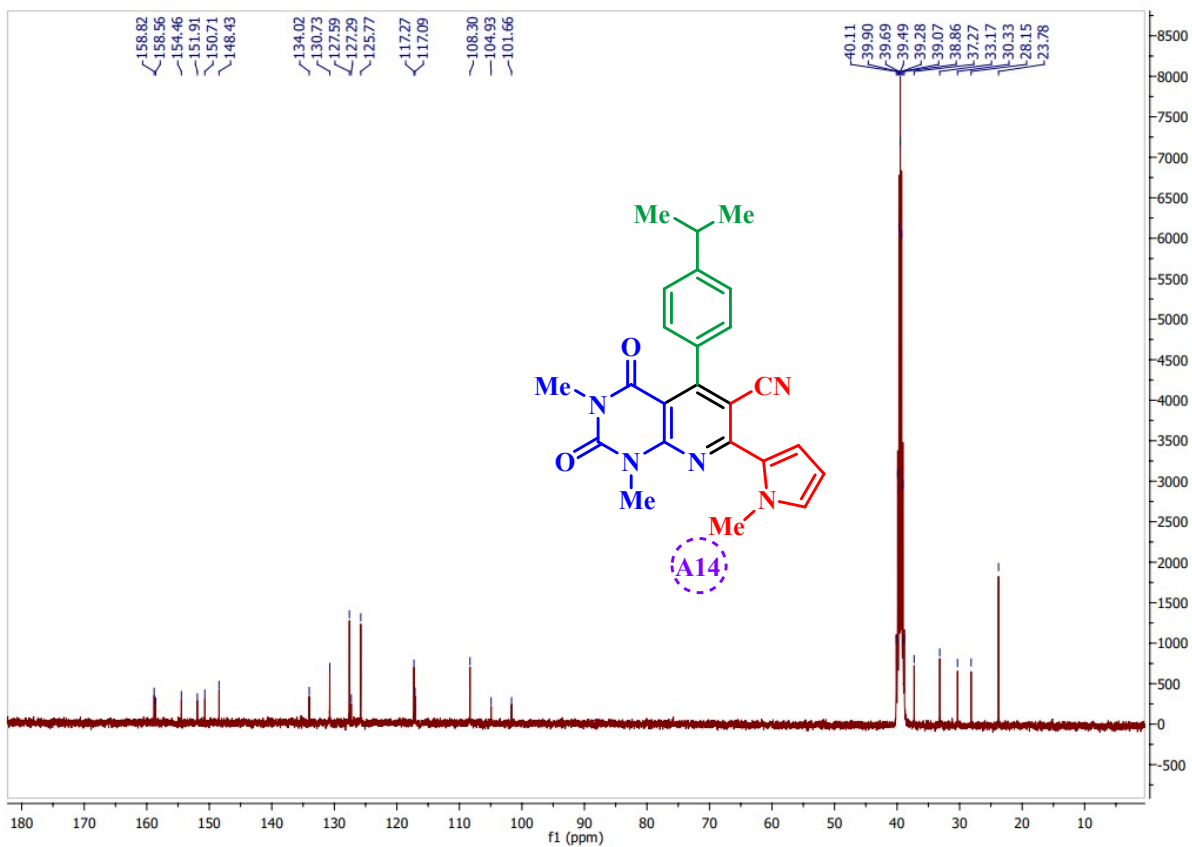

<sup>13</sup>C-NMR spectrum of 5-(4-isopropylphenyl)-1,3-dimethyl-7-(1-methyl-1H-pyrrol-2-yl)-2,4-dioxo-1,2,3,4-tetrahydropyrido[2,3-d]pyrimidine-6-carbonitrile (A14).

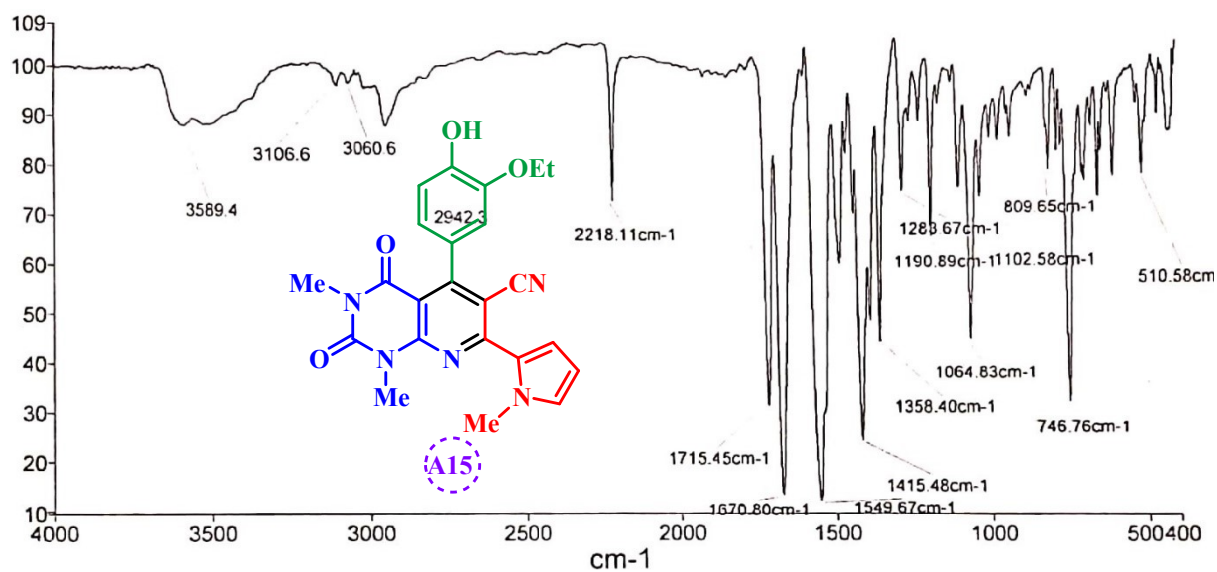

FT-IR spectrum of 5-(3-ethoxy-4-hydroxyphenyl)-1,3-dimethyl-7-(1-methyl-1H-pyrrol-2-yl)-2,4-dioxo-1,2,3,4-tetrahydropyrido[2,3-d]pyrimidine-6-carbonitrile (A15).

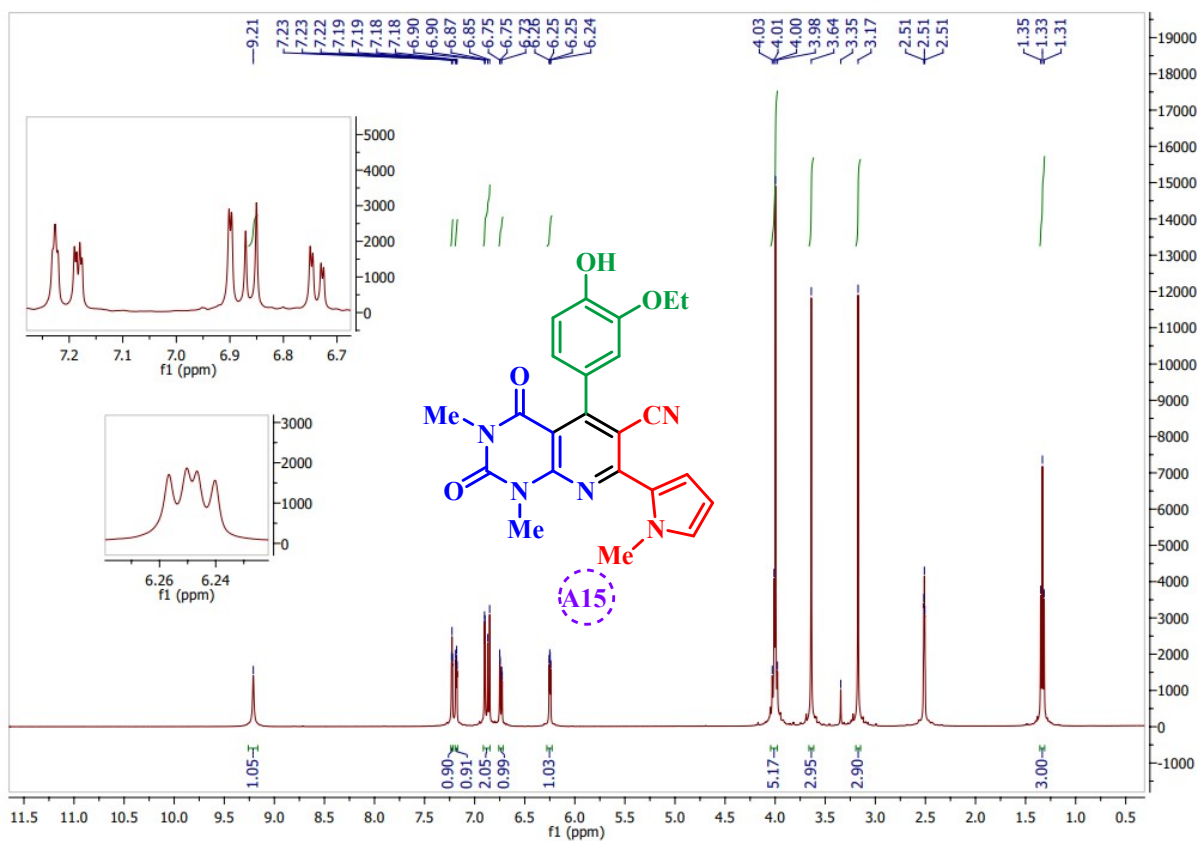

*<sup>1</sup>H-NMR spectrum of 5-(3-ethoxy-4-hydroxyphenyl)-1,3-dimethyl-7-(1-methyl-1H-pyrrol-2-yl)-2,4-dioxo-1,2,3,4-tetrahydropyrido[2,3-d]pyrimidine-6-carbonitrile (A15).*

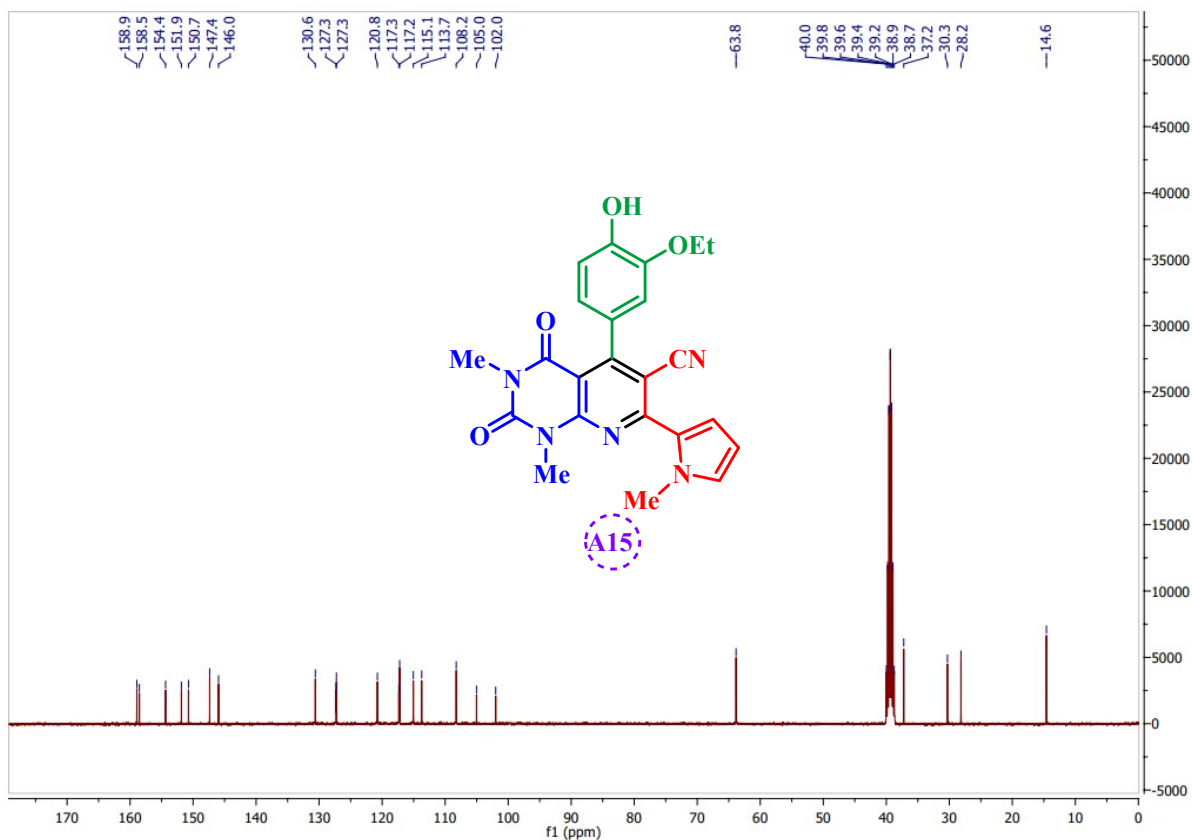

<sup>13</sup>C-NMR spectrum of 5-(3-ethoxy-4-hydroxyphenyl)-1,3-dimethyl-7-(1-methyl-1H-pyrrol-2-yl)-2,4-dioxo-1,2,3,4-tetrahydropyrido[2,3-d]pyrimidine-6-carbonitrile (A15).

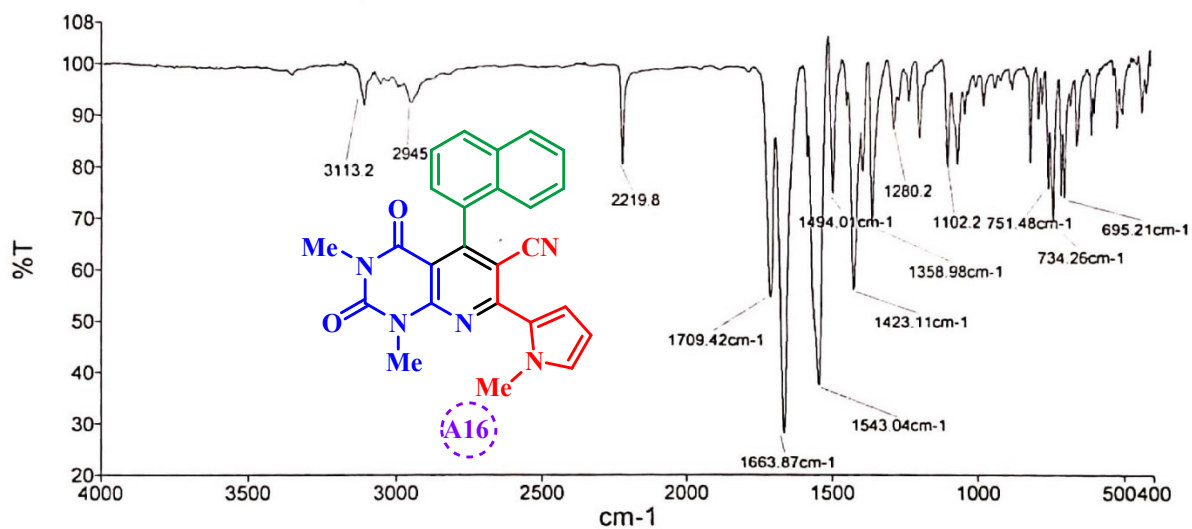

FT-IR spectrum of 1,3-dimethyl-7-(1-methyl-1H-pyrrol-2-yl)-5-(naphthalen-1-yl)-2,4-dioxo-1,2,3,4-tetrahydropyrido[2,3-d]pyrimidine-6-carbonitrile (A16).

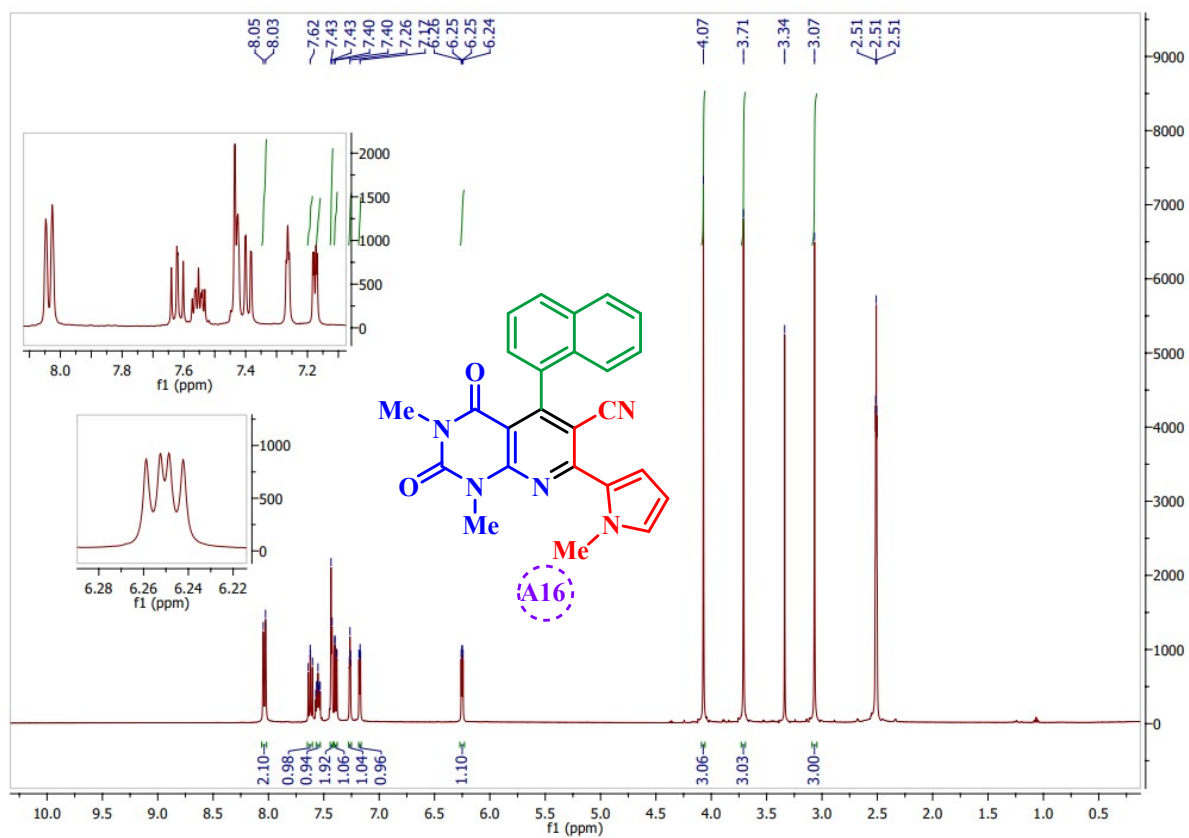

<sup>1</sup>H-NMR spectrum of 1,3-dimethyl-7-(1-methyl-1H-pyrrol-2-yl)-5-(naphthalen-1-yl)-2,4-dioxo-1,2,3,4-tetrahydropyrido[2,3-d]pyrimidine-6-carbonitrile (A16).



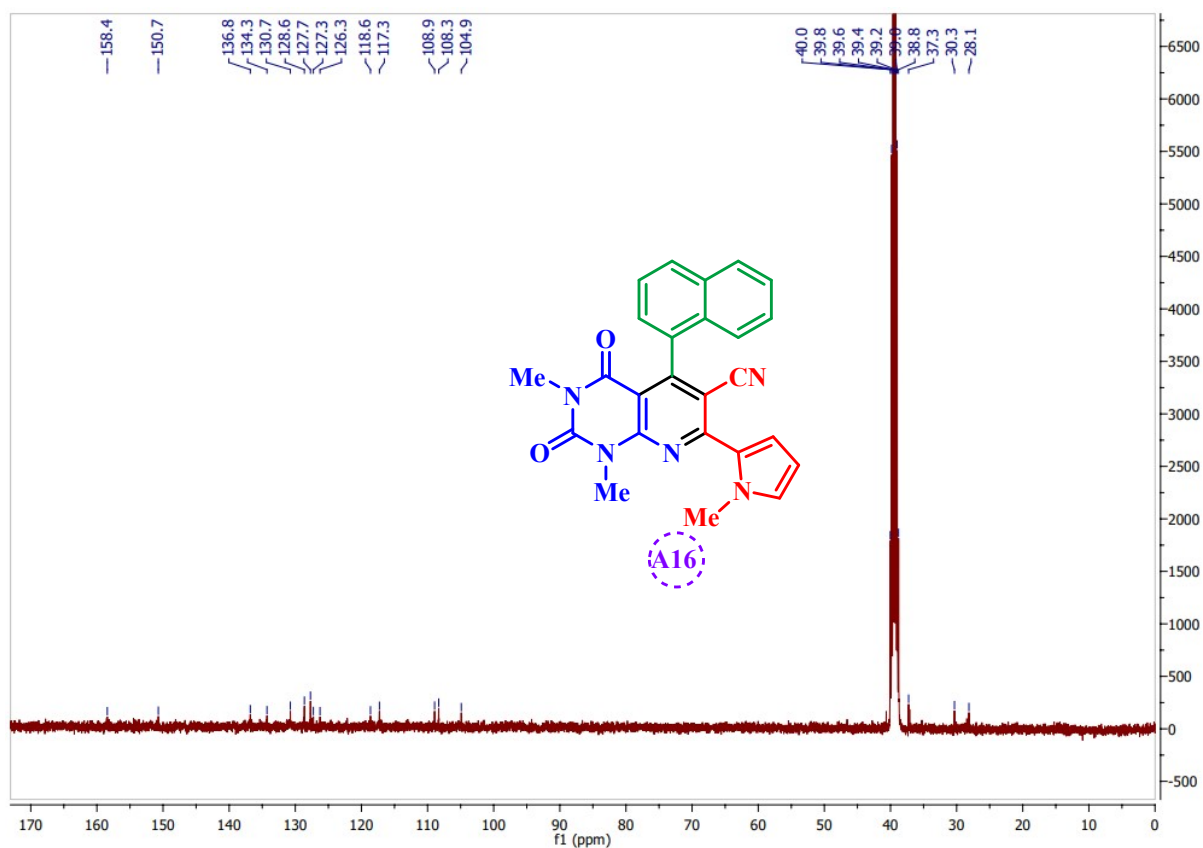

*<sup>13</sup>C-NMR spectrum of 1,3-dimethyl-7-(1-methyl-1H-pyrrol-2-yl)-5-(naphthalen-1-yl)-2,4-dioxo-1,2,3,4-tetrahydropyrido[2,3-d]pyrimidine-6-carbonitrile (A16).*

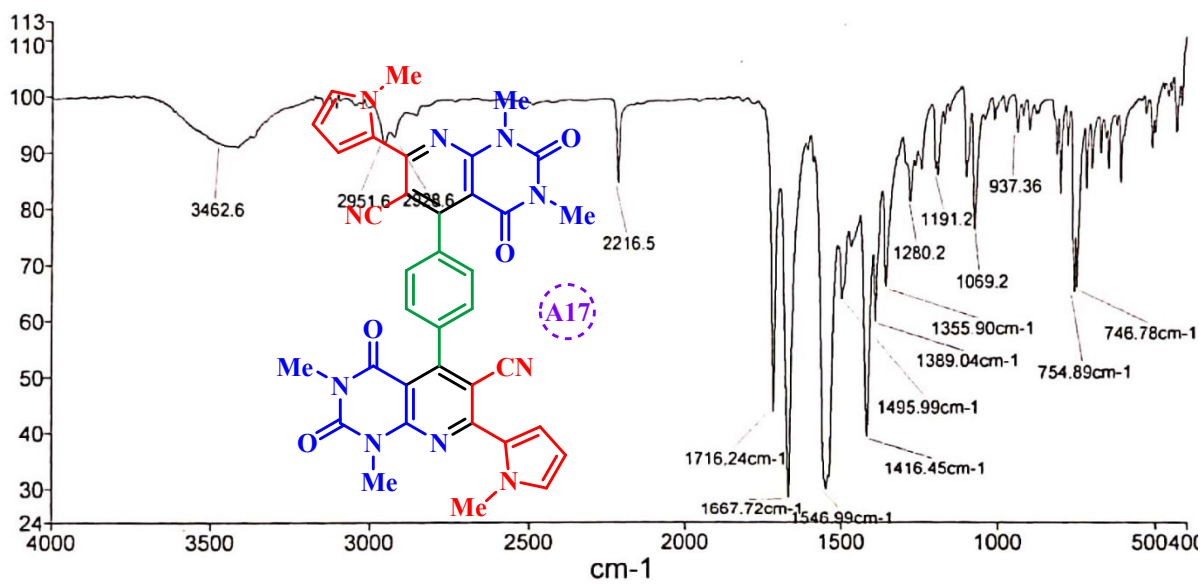

FT-IR spectrum of 5,5'-(1,4-phenylene)bis(1,3-dimethyl-7-(1-methyl-1H-pyrrol-2-yl)-2,4-dioxo-1,2,3,4-tetrahydropyrido[2,3-d]pyrimidine-6-carbonitrile) (A17).

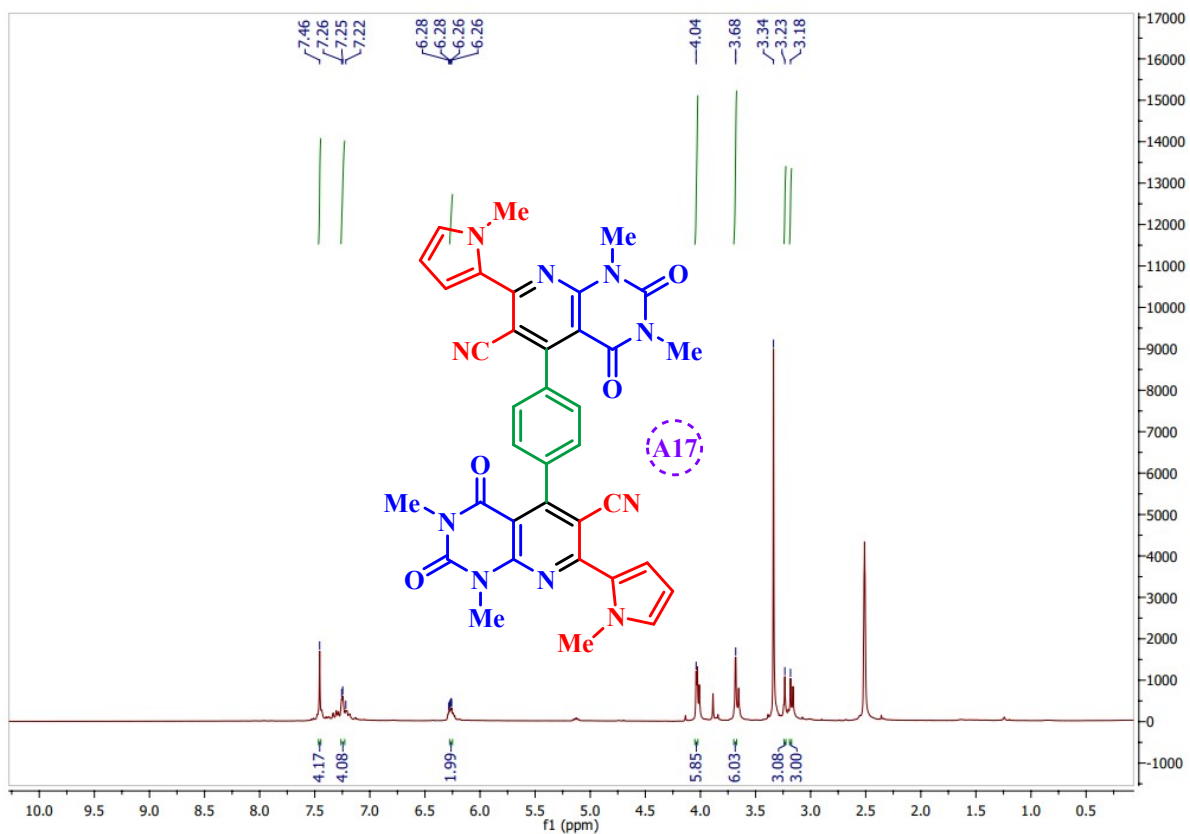

$^1\text{H-NMR}$  spectrum of 5,5'-(1,4-phenylene)bis(1,3-dimethyl-7-(1-methyl-1H-pyrrol-2-yl)-2,4-dioxo-1,2,3,4-tetrahydropyrido[2,3-d]pyrimidine-6-carbonitrile) (A17).

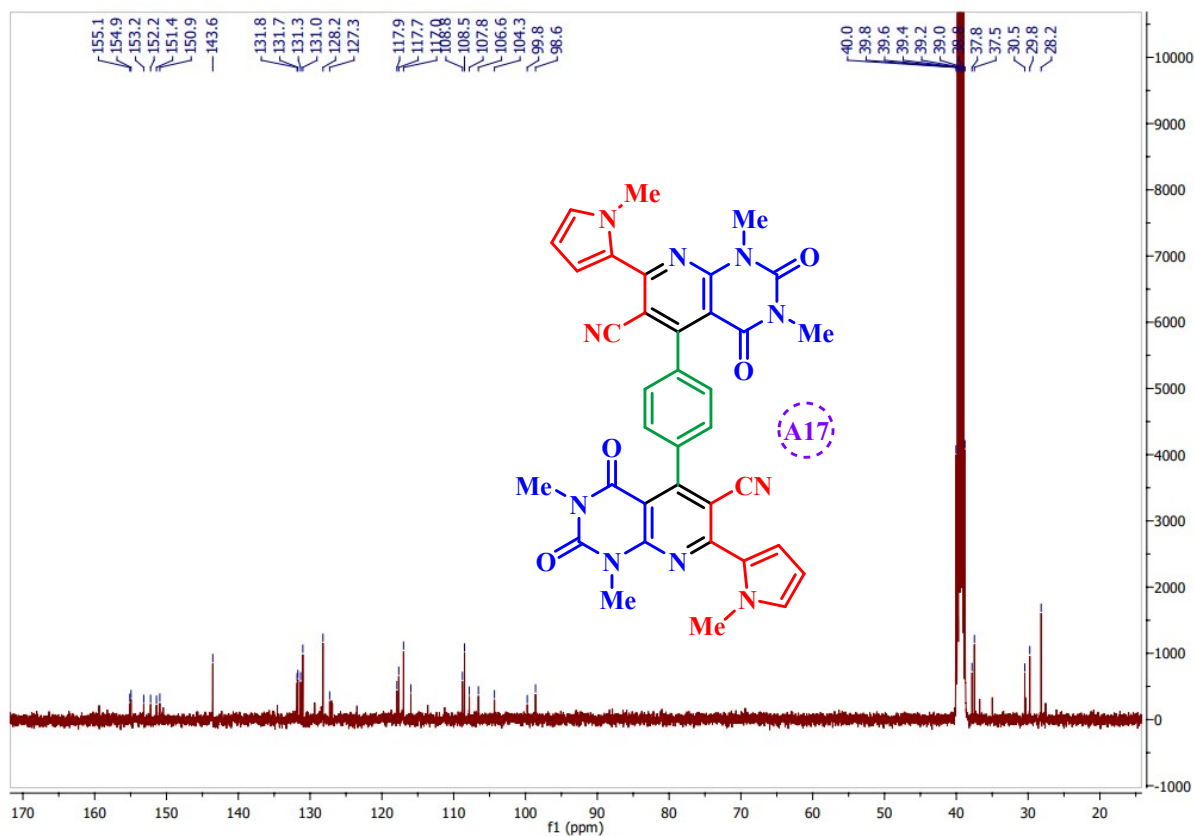

$^{13}\text{C}$ -NMR spectrum of 5,5'-(1,4-phenylene)bis(1,3-dimethyl-7-(1-methyl-1H-pyrrol-2-yl)-2,4-dioxo-1,2,3,4-tetrahydropyrido[2,3-d]pyrimidine-6-carbonitrile) (A17).
